# Supplementary material for: IgG Immune Complexes Inhibit Naïve T Cell Proliferation and Suppress Effector Function in Cytotoxic T Cells
Source: Front Immunol. 2021 Aug 10;12:713704. doi: 10.3389/fimmu.2021.713704 (PMC8383740; doi:10.3389/fimmu.2021.713704)
Supplement: Supplementary file 2 [file DataSheet_2.xlsx]

## Sheet: A_Raw FlowJo Data_(Insert Here)
Treatment A	Values Exported From FlowJo
Gate 1	15
Gate 2	5
Gate 3	2
Gate 4	15		<< Use Export Feature On FlowJo To Obtain Gated Values called "Xi" values On Sheet "B"
Gate 5	10
Gate 6	22
Gate 7	10
Gate 8	11
Gate 9	10
Treatment B
Gate 1	10
Gate 2	8
Gate 3	8
Gate 4	20
Gate 5	10		CopyNumbers to Column C of Sheet B Under "Sample Data"	Sample Data
Gate 6	30
Gate 7	7
Gate 8	7
Gate 9

## Sheet: B_% Undivided (Phi)_Copy From A
For D Divisions	Φ1	Sample Data			For D Divisions	Φ2				For D Divisions	Φ3				For D Divisions	Φ4				For D Divisions	Φ5				For D Divisions	Φ6				For D Divisions	Φ7				For D Divisions	Φ8				For D Divisions	Φ9				For D Divisions	Φ10
i = 1 to D	D=	Viability =			i = 1 to D	D=	Viability =			i = 1 to D	D=	Viability =			i = 1 to D	D=	Viability =			i = 1 to D	D=	Viability =			i = 1 to D	D=	Viability =			i = 1 to D	D=	Viability =			i = 1 to D	D=	Viability =			i = 1 to D	D=	Viability =			i = 1 to D	D=	Viability =
i	Xi	Xi Value	Xi+1 / 2^i	Xi''	i	Xi	Xi Value	Xi+1 / 2^i	Xi''	i	Xi	Xi Value	Xi+1 / 2^i	Xi''	i	Xi	Xi Value	Xi+1 / 2^i	Xi''	i	Xi	Xi Value	Xi+1 / 2^i	Xi''	i	Xi	Xi Value	Xi+1 / 2^i	Xi''	i	Xi	Xi Value	Xi+1 / 2^i	Xi''	i	Xi	Xi Value	Xi+1 / 2^i	Xi''	i	Xi	Xi Value	Xi+1 / 2^i	Xi''	i	Xi	Xi Value	Xi+1 / 2^i	Xi''
1	X1	15	2.5	5.88235	1	X1	5.88235	1.17647	2.5	1	X1	2.5	9.375	19.2308	1	X1	19.2308	6.41026	15.873	1	X1	15.873	17.4603	41.5094	1	X1	41.5094	9.43396	32.2581	1	X1	32.2581	17.7419	52.381	1	X1	52.381	23.8095	100	1	X1	100	0	#DIV/0!	1	X1	#DIV/0!	#DIV/0!	#DIV/0!
2	X2	5	0.5	2.35294	2	X2	2.35294	4.41176	18.75	2	X2	18.75	3.125	12.8205	2	X2	12.8205	7.05128	34.9206	2	X2	34.9206	3.96825	18.8679	2	X2	18.8679	5.18868	35.4839	2	X2	35.4839	8.06452	47.619	2	X2	47.619	0	0	2	X2	0	0	#DIV/0!	2	X2	#DIV/0!	#DIV/0!	#DIV/0!
3	X3	2	1.875	17.6471	3	X3	17.6471	1.47059	12.5	3	X3	12.5	3.4375	28.2051	3	X3	28.2051	1.60256	15.873	3	X3	15.873	2.18254	20.7547	3	X3	20.7547	2.35849	32.2581	3	X3	32.2581	0	0	3	X3	0	0	0	3	X3	0	0	#DIV/0!	3	X3	#DIV/0!	#DIV/0!	#DIV/0!
4	X4	15	0.625	11.7647	4	X4	11.7647	1.61765	27.5	4	X4	27.5	0.78125	12.8205	4	X4	12.8205	0.88141	17.4603	4	X4	17.4603	0.992063	18.8679	4	X4	18.8679	0	0	4	X4	0	0	0	4	X4	0	0	0	4	X4	0	0	#DIV/0!	4	X4	#DIV/0!	#DIV/0!	#DIV/0!
5	X5	10	0.6875	25.8824	5	X5	25.8824	0.367647	12.5	5	X5	12.5	0.429688	14.1026	5	X5	14.1026	0.400641	15.873	5	X5	15.873	0	0	5	X5	0	0	0	5	X5	0	0	0	5	X5	0	0	0	5	X5	0	0	#DIV/0!	5	X5	#DIV/0!	#DIV/0!	#DIV/0!
6	X6	22	0.15625	11.7647	6	X6	11.7647	0.202206	13.75	6	X6	13.75	0.195312	12.8205	6	X6	12.8205	0	0	6	X6	0	0	0	6	X6	0	0	0	6	X6	0	0	0	6	X6	0	0	0	6	X6	0	0	#DIV/0!	6	X6	#DIV/0!	#DIV/0!	#DIV/0!
7	X7	10	0.0859375	12.9412	7	X7	12.9412	0.0919118	12.5	7	X7	12.5	0	0	7	X7	0	0	0	7	X7	0	0	0	7	X7	0	0	0	7	X7	0	0	0	7	X7	0	0	0	7	X7	0	0	#DIV/0!	7	X7	#DIV/0!	#DIV/0!	#DIV/0!
8	X8	11	0.0390625	11.7647	8	X8	11.7647	0	0	8	X8	0	0	0	8	X8	0	0	0	8	X8	0	0	0	8	X8	0	0	0	8	X8	0	0	0	8	X8	0	0	0	8	X8	0	0	#DIV/0!	8	X8	#DIV/0!	#DIV/0!	#DIV/0!
9	X9	10	0	0	9	X9	0	0	0	9	X9	0	0	0	9	X9	0	0	0	9	X9	0	0	0	9	X9	0	0	0	9	X9	0	0	0	9	X9	0	0	0	9	X9	0	0	#DIV/0!	9	X9	#DIV/0!	#DIV/0!	#DIV/0!
10	X10		0	0	10	X10	0	0	0	10	X10	0	0	0	10	X10	0	0	0	10	X10	0	0	0	10	X10	0	0	0	10	X10	0	0	0	10	X10	0	0	0	10	X10	0	0	#DIV/0!	10	X10	#DIV/0!	#DIV/0!	#DIV/0!
11	X11		0	0	11	X11	0	0	0	11	X11	0	0	0	11	X11	0	0	0	11	X11	0	0	0	11	X11	0	0	0	11	X11	0	0	0	11	X11	0	0	0	11	X11	0	0	#DIV/0!	11	X11	#DIV/0!	#DIV/0!	#DIV/0!
12	X12		0	0	12	X12	0	0	0	12	X12	0	0	0	12	X12	0	0	0	12	X12	0	0	0	12	X12	0	0	0	12	X12	0	0	0	12	X12	0	0	0	12	X12	0	0	#DIV/0!	12	X12	#DIV/0!	0	#DIV/0!
D	XD	100	85	100	D	XD	100	94.1176	100	D	XD	100	97.5	100	D	XD	100	80.7692	100	D	XD	100	84.127	100	D	XD	100	58.4906	100	D	XD	100	67.7419	100	D	XD	100	47.619	100	D	XD	100	0	#DIV/0!	D	XD	#DIV/0!	#DIV/0!	#DIV/0!
		Σ (Xi+1 / 2^i)	6.46875				Σ (Xi+1 / 2^i)	9.33824				Σ (Xi+1 / 2^i)	17.3438				Σ (Xi+1 / 2^i)	16.3462				Σ (Xi+1 / 2^i)	24.6032				Σ (Xi+1 / 2^i)	16.9811				Σ (Xi+1 / 2^i)	25.8065				Σ (Xi+1 / 2^i)	23.8095				Σ (Xi+1 / 2^i)	0				Σ (Xi+1 / 2^i)	#DIV/0!
		Φ	69.869				Φ	38.6473				Φ	12.5984				Φ	54.0541				Φ	39.2157				Φ	70.9677				Φ	55.5556				Φ	68.75				Φ	100				Φ	#DIV/0!
For D Divisions	Φ1	Sample Data			For D Divisions	Φ2				For D Divisions	Φ3				For D Divisions	Φ4				For D Divisions	Φ5				For D Divisions	Φ6				For D Divisions	Φ7				For D Divisions	Φ8				For D Divisions	Φ9				For D Divisions	Φ10
i = 1 to D	D=	Viability =			i = 1 to D	D=	Viability =			i = 1 to D	D=	Viability =			i = 1 to D	D=	Viability =			i = 1 to D	D=	Viability =			i = 1 to D	D=	Viability =			i = 1 to D	D=	Viability =			i = 1 to D	D=	Viability =			i = 1 to D	D=	Viability =			i = 1 to D	D=	Viability =
i	Xi	Xi Value	Xi+1 / 2^i	Xi''	i	Xi	Xi Value	Xi+1 / 2^i	Xi''	i	Xi	Xi Value	Xi+1 / 2^i	Xi''	i	Xi	Xi Value	Xi+1 / 2^i	Xi''	i	Xi	Xi Value	Xi+1 / 2^i	Xi''	i	Xi	Xi Value	Xi+1 / 2^i	Xi''	i	Xi	Xi Value	Xi+1 / 2^i	Xi''	i	Xi	Xi Value	Xi+1 / 2^i	Xi''	i	Xi	Xi Value	Xi+1 / 2^i	Xi''	i	Xi	Xi Value	Xi+1 / 2^i	Xi''
1	X1	10	4	8.88889	1	X1	8.88889	4.44444	9.7561	1	X1	9.7561	12.1951	27.027	1	X1	27.027	6.25391	18.5185	1	X1	18.5185	27.7778	68.1818	1	X1	68.1818	7.95455	50	1	X1	50	25	100	1	X1	100	0	#DIV/0!	1	X1	#DIV/0!	#DIV/0!	#DIV/0!	1	X1	#DIV/0!	#DIV/0!	#DIV/0!
2	X2	8	2	8.88889	2	X2	8.88889	5.55556	24.3902	2	X2	24.3902	3.04878	12.5078	2	X2	12.5078	9.38086	55.5556	2	X2	55.5556	3.24074	15.9091	2	X2	15.9091	3.97727	50	2	X2	50	0	0	2	X2	0	0	#DIV/0!	2	X2	#DIV/0!	#DIV/0!	#DIV/0!	2	X2	#DIV/0!	#DIV/0!	#DIV/0!
3	X3	8	2.5	22.2222	3	X3	22.2222	1.38889	12.1951	3	X3	12.1951	4.57317	37.5235	3	X3	37.5235	1.09443	12.963	3	X3	12.963	1.62037	15.9091	3	X3	15.9091	0	0	3	X3	0	0	0	3	X3	0	0	#DIV/0!	3	X3	#DIV/0!	#DIV/0!	#DIV/0!	3	X3	#DIV/0!	#DIV/0!	#DIV/0!
4	X4	20	0.625	11.1111	4	X4	11.1111	2.08333	36.5854	4	X4	36.5854	0.533537	8.75547	4	X4	8.75547	0.547217	12.963	4	X4	12.963	0	0	4	X4	0	0	0	4	X4	0	0	0	4	X4	0	0	#DIV/0!	4	X4	#DIV/0!	#DIV/0!	#DIV/0!	4	X4	#DIV/0!	#DIV/0!	#DIV/0!
5	X5	10	0.9375	33.3333	5	X5	33.3333	0.243056	8.53659	5	X5	8.53659	0.266768	8.75547	5	X5	8.75547	0	0	5	X5	0	0	0	5	X5	0	0	0	5	X5	0	0	0	5	X5	0	0	#DIV/0!	5	X5	#DIV/0!	#DIV/0!	#DIV/0!	5	X5	#DIV/0!	#DIV/0!	#DIV/0!
6	X6	30	0.109375	7.77778	6	X6	7.77778	0.121528	8.53659	6	X6	8.53659	0	0	6	X6	0	0	0	6	X6	0	0	0	6	X6	0	0	0	6	X6	0	0	0	6	X6	0	0	#DIV/0!	6	X6	#DIV/0!	#DIV/0!	#DIV/0!	6	X6	#DIV/0!	#DIV/0!	#DIV/0!
7	X7	7	0.0546875	7.77778	7	X7	7.77778	0	0	7	X7	0	0	0	7	X7	0	0	0	7	X7	0	0	0	7	X7	0	0	0	7	X7	0	0	0	7	X7	0	0	#DIV/0!	7	X7	#DIV/0!	#DIV/0!	#DIV/0!	7	X7	#DIV/0!	#DIV/0!	#DIV/0!
8	X8	7	0	0	8	X8	0	0	0	8	X8	0	0	0	8	X8	0	0	0	8	X8	0	0	0	8	X8	0	0	0	8	X8	0	0	0	8	X8	0	0	#DIV/0!	8	X8	#DIV/0!	#DIV/0!	#DIV/0!	8	X8	#DIV/0!	#DIV/0!	#DIV/0!
9	X9		0	0	9	X9	0	0	0	9	X9	0	0	0	9	X9	0	0	0	9	X9	0	0	0	9	X9	0	0	0	9	X9	0	0	0	9	X9	0	0	#DIV/0!	9	X9	#DIV/0!	#DIV/0!	#DIV/0!	9	X9	#DIV/0!	#DIV/0!	#DIV/0!
10	X10		0	0	10	X10	0	0	0	10	X10	0	0	0	10	X10	0	0	0	10	X10	0	0	0	10	X10	0	0	0	10	X10	0	0	0	10	X10	0	0	#DIV/0!	10	X10	#DIV/0!	#DIV/0!	#DIV/0!	10	X10	#DIV/0!	#DIV/0!	#DIV/0!
11	X11		0	0	11	X11	0	0	0	11	X11	0	0	0	11	X11	0	0	0	11	X11	0	0	0	11	X11	0	0	0	11	X11	0	0	0	11	X11	0	0	#DIV/0!	11	X11	#DIV/0!	#DIV/0!	#DIV/0!	11	X11	#DIV/0!	#DIV/0!	#DIV/0!
12	X12		0	0	12	X12	0	0	0	12	X12	0	0	0	12	X12	0	0	0	12	X12	0	0	0	12	X12	0	0	0	12	X12	0	0	0	12	X12	0	0	#DIV/0!	12	X12	#DIV/0!	0	#DIV/0!	12	X12	#DIV/0!	0	#DIV/0!
D	XD	100	90	100	D	XD	100	91.1111	100	D	XD	100	90.2439	94.5692	D	XD	94.5692	67.5422	100	D	XD	100	81.4815	100	D	XD	100	31.8182	100	D	XD	100	50	100	D	XD	100	0	#DIV/0!	D	XD	#DIV/0!	#DIV/0!	#DIV/0!	D	XD	#DIV/0!	#DIV/0!	#DIV/0!
		Σ (Xi+1 / 2^i)	10.2266				Σ (Xi+1 / 2^i)	13.8368				Σ (Xi+1 / 2^i)	20.6174				Σ (Xi+1 / 2^i)	17.2764				Σ (Xi+1 / 2^i)	32.6389				Σ (Xi+1 / 2^i)	11.9318				Σ (Xi+1 / 2^i)	25				Σ (Xi+1 / 2^i)	0				Σ (Xi+1 / 2^i)	#DIV/0!				Σ (Xi+1 / 2^i)	#DIV/0!
		Φ	49.4399				Φ	39.1138				Φ	32.1205				Φ	61.0043				Φ	36.1991				Φ	85.1064				Φ	66.6667				Φ	100				Φ	#DIV/0!				Φ	#DIV/0!
For D Divisions	Φ1	Copy Data			For D Divisions	Φ2				For D Divisions	Φ3				For D Divisions	Φ4				For D Divisions	Φ5				For D Divisions	Φ6				For D Divisions	Φ7				For D Divisions	Φ8				For D Divisions	Φ9				For D Divisions	Φ10
i = 1 to D	D=	Viability =			i = 1 to D	D=	Viability =			i = 1 to D	D=	Viability =			i = 1 to D	D=	Viability =			i = 1 to D	D=	Viability =			i = 1 to D	D=	Viability =			i = 1 to D	D=	Viability =			i = 1 to D	D=	Viability =			i = 1 to D	D=	Viability =			i = 1 to D	D=	Viability =
i	Xi	Xi Value	Xi+1 / 2^i	Xi''	i	Xi	Xi Value	Xi+1 / 2^i	Xi''	i	Xi	Xi Value	Xi+1 / 2^i	Xi''	i	Xi	Xi Value	Xi+1 / 2^i	Xi''	i	Xi	Xi Value	Xi+1 / 2^i	Xi''	i	Xi	Xi Value	Xi+1 / 2^i	Xi''	i	Xi	Xi Value	Xi+1 / 2^i	Xi''	i	Xi	Xi Value	Xi+1 / 2^i	Xi''	i	Xi	Xi Value	Xi+1 / 2^i	Xi''	i	Xi	Xi Value	Xi+1 / 2^i	Xi''
1	X1		0	#DIV/0!	1	X1	#DIV/0!	#DIV/0!	#DIV/0!	1	X1	#DIV/0!	#DIV/0!	#DIV/0!	1	X1	#DIV/0!	#DIV/0!	#DIV/0!	1	X1	#DIV/0!	#DIV/0!	#DIV/0!	1	X1	#DIV/0!	#DIV/0!	#DIV/0!	1	X1	#DIV/0!	#DIV/0!	#DIV/0!	1	X1	#DIV/0!	#DIV/0!	#DIV/0!	1	X1	#DIV/0!	#DIV/0!	#DIV/0!	1	X1	#DIV/0!	#DIV/0!	#DIV/0!
2	X2		0	#DIV/0!	2	X2	#DIV/0!	#DIV/0!	#DIV/0!	2	X2	#DIV/0!	#DIV/0!	#DIV/0!	2	X2	#DIV/0!	#DIV/0!	#DIV/0!	2	X2	#DIV/0!	#DIV/0!	#DIV/0!	2	X2	#DIV/0!	#DIV/0!	#DIV/0!	2	X2	#DIV/0!	#DIV/0!	#DIV/0!	2	X2	#DIV/0!	#DIV/0!	#DIV/0!	2	X2	#DIV/0!	#DIV/0!	#DIV/0!	2	X2	#DIV/0!	#DIV/0!	#DIV/0!
3	X3		0	#DIV/0!	3	X3	#DIV/0!	#DIV/0!	#DIV/0!	3	X3	#DIV/0!	#DIV/0!	#DIV/0!	3	X3	#DIV/0!	#DIV/0!	#DIV/0!	3	X3	#DIV/0!	#DIV/0!	#DIV/0!	3	X3	#DIV/0!	#DIV/0!	#DIV/0!	3	X3	#DIV/0!	#DIV/0!	#DIV/0!	3	X3	#DIV/0!	#DIV/0!	#DIV/0!	3	X3	#DIV/0!	#DIV/0!	#DIV/0!	3	X3	#DIV/0!	#DIV/0!	#DIV/0!
4	X4		0	#DIV/0!	4	X4	#DIV/0!	#DIV/0!	#DIV/0!	4	X4	#DIV/0!	#DIV/0!	#DIV/0!	4	X4	#DIV/0!	#DIV/0!	#DIV/0!	4	X4	#DIV/0!	#DIV/0!	#DIV/0!	4	X4	#DIV/0!	#DIV/0!	#DIV/0!	4	X4	#DIV/0!	#DIV/0!	#DIV/0!	4	X4	#DIV/0!	#DIV/0!	#DIV/0!	4	X4	#DIV/0!	#DIV/0!	#DIV/0!	4	X4	#DIV/0!	#DIV/0!	#DIV/0!
5	X5		0	#DIV/0!	5	X5	#DIV/0!	#DIV/0!	#DIV/0!	5	X5	#DIV/0!	#DIV/0!	#DIV/0!	5	X5	#DIV/0!	#DIV/0!	#DIV/0!	5	X5	#DIV/0!	#DIV/0!	#DIV/0!	5	X5	#DIV/0!	#DIV/0!	#DIV/0!	5	X5	#DIV/0!	#DIV/0!	#DIV/0!	5	X5	#DIV/0!	#DIV/0!	#DIV/0!	5	X5	#DIV/0!	#DIV/0!	#DIV/0!	5	X5	#DIV/0!	#DIV/0!	#DIV/0!
6	X6		0	#DIV/0!	6	X6	#DIV/0!	#DIV/0!	#DIV/0!	6	X6	#DIV/0!	#DIV/0!	#DIV/0!	6	X6	#DIV/0!	#DIV/0!	#DIV/0!	6	X6	#DIV/0!	#DIV/0!	#DIV/0!	6	X6	#DIV/0!	#DIV/0!	#DIV/0!	6	X6	#DIV/0!	#DIV/0!	#DIV/0!	6	X6	#DIV/0!	#DIV/0!	#DIV/0!	6	X6	#DIV/0!	#DIV/0!	#DIV/0!	6	X6	#DIV/0!	#DIV/0!	#DIV/0!
7	X7		0	#DIV/0!	7	X7	#DIV/0!	#DIV/0!	#DIV/0!	7	X7	#DIV/0!	#DIV/0!	#DIV/0!	7	X7	#DIV/0!	#DIV/0!	#DIV/0!	7	X7	#DIV/0!	#DIV/0!	#DIV/0!	7	X7	#DIV/0!	#DIV/0!	#DIV/0!	7	X7	#DIV/0!	#DIV/0!	#DIV/0!	7	X7	#DIV/0!	#DIV/0!	#DIV/0!	7	X7	#DIV/0!	#DIV/0!	#DIV/0!	7	X7	#DIV/0!	#DIV/0!	#DIV/0!
8	X8		0	#DIV/0!	8	X8	#DIV/0!	#DIV/0!	#DIV/0!	8	X8	#DIV/0!	#DIV/0!	#DIV/0!	8	X8	#DIV/0!	#DIV/0!	#DIV/0!	8	X8	#DIV/0!	#DIV/0!	#DIV/0!	8	X8	#DIV/0!	#DIV/0!	#DIV/0!	8	X8	#DIV/0!	#DIV/0!	#DIV/0!	8	X8	#DIV/0!	#DIV/0!	#DIV/0!	8	X8	#DIV/0!	#DIV/0!	#DIV/0!	8	X8	#DIV/0!	#DIV/0!	#DIV/0!
9	X9		0	#DIV/0!	9	X9	#DIV/0!	#DIV/0!	#DIV/0!	9	X9	#DIV/0!	#DIV/0!	#DIV/0!	9	X9	#DIV/0!	#DIV/0!	#DIV/0!	9	X9	#DIV/0!	#DIV/0!	#DIV/0!	9	X9	#DIV/0!	#DIV/0!	#DIV/0!	9	X9	#DIV/0!	#DIV/0!	#DIV/0!	9	X9	#DIV/0!	#DIV/0!	#DIV/0!	9	X9	#DIV/0!	#DIV/0!	#DIV/0!	9	X9	#DIV/0!	#DIV/0!	#DIV/0!
10	X10		0	#DIV/0!	10	X10	#DIV/0!	#DIV/0!	#DIV/0!	10	X10	#DIV/0!	#DIV/0!	#DIV/0!	10	X10	#DIV/0!	#DIV/0!	#DIV/0!	10	X10	#DIV/0!	#DIV/0!	#DIV/0!	10	X10	#DIV/0!	#DIV/0!	#DIV/0!	10	X10	#DIV/0!	#DIV/0!	#DIV/0!	10	X10	#DIV/0!	#DIV/0!	#DIV/0!	10	X10	#DIV/0!	#DIV/0!	#DIV/0!	10	X10	#DIV/0!	#DIV/0!	#DIV/0!
11	X11		0	#DIV/0!	11	X11	#DIV/0!	#DIV/0!	#DIV/0!	11	X11	#DIV/0!	#DIV/0!	#DIV/0!	11	X11	#DIV/0!	#DIV/0!	#DIV/0!	11	X11	#DIV/0!	#DIV/0!	#DIV/0!	11	X11	#DIV/0!	#DIV/0!	#DIV/0!	11	X11	#DIV/0!	#DIV/0!	#DIV/0!	11	X11	#DIV/0!	#DIV/0!	#DIV/0!	11	X11	#DIV/0!	#DIV/0!	#DIV/0!	11	X11	#DIV/0!	#DIV/0!	#DIV/0!
12	X12		0	#DIV/0!	12	X12	#DIV/0!	0	#DIV/0!	12	X12	#DIV/0!	0	#DIV/0!	12	X12	#DIV/0!	0	#DIV/0!	12	X12	#DIV/0!	0	#DIV/0!	12	X12	#DIV/0!	0	#DIV/0!	12	X12	#DIV/0!	0	#DIV/0!	12	X12	#DIV/0!	0	#DIV/0!	12	X12	#DIV/0!	0	#DIV/0!	12	X12	#DIV/0!	0	#DIV/0!
D	XD	0	0	#DIV/0!	D	XD	#DIV/0!	#DIV/0!	#DIV/0!	D	XD	#DIV/0!	#DIV/0!	#DIV/0!	D	XD	#DIV/0!	#DIV/0!	#DIV/0!	D	XD	#DIV/0!	#DIV/0!	#DIV/0!	D	XD	#DIV/0!	#DIV/0!	#DIV/0!	D	XD	#DIV/0!	#DIV/0!	#DIV/0!	D	XD	#DIV/0!	#DIV/0!	#DIV/0!	D	XD	#DIV/0!	#DIV/0!	#DIV/0!	D	XD	#DIV/0!	#DIV/0!	#DIV/0!
		Σ (Xi+1 / 2^i)	0				Σ (Xi+1 / 2^i)	#DIV/0!				Σ (Xi+1 / 2^i)	#DIV/0!				Σ (Xi+1 / 2^i)	#DIV/0!				Σ (Xi+1 / 2^i)	#DIV/0!				Σ (Xi+1 / 2^i)	#DIV/0!				Σ (Xi+1 / 2^i)	#DIV/0!				Σ (Xi+1 / 2^i)	#DIV/0!				Σ (Xi+1 / 2^i)	#DIV/0!				Σ (Xi+1 / 2^i)	#DIV/0!
		Φ	#DIV/0!				Φ	#DIV/0!				Φ	#DIV/0!				Φ	#DIV/0!				Φ	#DIV/0!				Φ	#DIV/0!				Φ	#DIV/0!				Φ	#DIV/0!				Φ	#DIV/0!				Φ	#DIV/0!
For D Divisions	Φ1	Copy Data			For D Divisions	Φ2				For D Divisions	Φ3				For D Divisions	Φ4				For D Divisions	Φ5				For D Divisions	Φ6				For D Divisions	Φ7				For D Divisions	Φ8				For D Divisions	Φ9				For D Divisions	Φ10
i = 1 to D	D=	Viability =			i = 1 to D	D=	Viability =			i = 1 to D	D=	Viability =			i = 1 to D	D=	Viability =			i = 1 to D	D=	Viability =			i = 1 to D	D=	Viability =			i = 1 to D	D=	Viability =			i = 1 to D	D=	Viability =			i = 1 to D	D=	Viability =			i = 1 to D	D=	Viability =
i	Xi	Xi Value	Xi+1 / 2^i	Xi''	i	Xi	Xi Value	Xi+1 / 2^i	Xi''	i	Xi	Xi Value	Xi+1 / 2^i	Xi''	i	Xi	Xi Value	Xi+1 / 2^i	Xi''	i	Xi	Xi Value	Xi+1 / 2^i	Xi''	i	Xi	Xi Value	Xi+1 / 2^i	Xi''	i	Xi	Xi Value	Xi+1 / 2^i	Xi''	i	Xi	Xi Value	Xi+1 / 2^i	Xi''	i	Xi	Xi Value	Xi+1 / 2^i	Xi''	i	Xi	Xi Value	Xi+1 / 2^i	Xi''
1	X1		0	#DIV/0!	1	X1	#DIV/0!	#DIV/0!	#DIV/0!	1	X1	#DIV/0!	#DIV/0!	#DIV/0!	1	X1	#DIV/0!	#DIV/0!	#DIV/0!	1	X1	#DIV/0!	#DIV/0!	#DIV/0!	1	X1	#DIV/0!	#DIV/0!	#DIV/0!	1	X1	#DIV/0!	#DIV/0!	#DIV/0!	1	X1	#DIV/0!	#DIV/0!	#DIV/0!	1	X1	#DIV/0!	#DIV/0!	#DIV/0!	1	X1	#DIV/0!	#DIV/0!	#DIV/0!
2	X2		0	#DIV/0!	2	X2	#DIV/0!	#DIV/0!	#DIV/0!	2	X2	#DIV/0!	#DIV/0!	#DIV/0!	2	X2	#DIV/0!	#DIV/0!	#DIV/0!	2	X2	#DIV/0!	#DIV/0!	#DIV/0!	2	X2	#DIV/0!	#DIV/0!	#DIV/0!	2	X2	#DIV/0!	#DIV/0!	#DIV/0!	2	X2	#DIV/0!	#DIV/0!	#DIV/0!	2	X2	#DIV/0!	#DIV/0!	#DIV/0!	2	X2	#DIV/0!	#DIV/0!	#DIV/0!
3	X3		0	#DIV/0!	3	X3	#DIV/0!	#DIV/0!	#DIV/0!	3	X3	#DIV/0!	#DIV/0!	#DIV/0!	3	X3	#DIV/0!	#DIV/0!	#DIV/0!	3	X3	#DIV/0!	#DIV/0!	#DIV/0!	3	X3	#DIV/0!	#DIV/0!	#DIV/0!	3	X3	#DIV/0!	#DIV/0!	#DIV/0!	3	X3	#DIV/0!	#DIV/0!	#DIV/0!	3	X3	#DIV/0!	#DIV/0!	#DIV/0!	3	X3	#DIV/0!	#DIV/0!	#DIV/0!
4	X4		0	#DIV/0!	4	X4	#DIV/0!	#DIV/0!	#DIV/0!	4	X4	#DIV/0!	#DIV/0!	#DIV/0!	4	X4	#DIV/0!	#DIV/0!	#DIV/0!	4	X4	#DIV/0!	#DIV/0!	#DIV/0!	4	X4	#DIV/0!	#DIV/0!	#DIV/0!	4	X4	#DIV/0!	#DIV/0!	#DIV/0!	4	X4	#DIV/0!	#DIV/0!	#DIV/0!	4	X4	#DIV/0!	#DIV/0!	#DIV/0!	4	X4	#DIV/0!	#DIV/0!	#DIV/0!
5	X5		0	#DIV/0!	5	X5	#DIV/0!	#DIV/0!	#DIV/0!	5	X5	#DIV/0!	#DIV/0!	#DIV/0!	5	X5	#DIV/0!	#DIV/0!	#DIV/0!	5	X5	#DIV/0!	#DIV/0!	#DIV/0!	5	X5	#DIV/0!	#DIV/0!	#DIV/0!	5	X5	#DIV/0!	#DIV/0!	#DIV/0!	5	X5	#DIV/0!	#DIV/0!	#DIV/0!	5	X5	#DIV/0!	#DIV/0!	#DIV/0!	5	X5	#DIV/0!	#DIV/0!	#DIV/0!
6	X6		0	#DIV/0!	6	X6	#DIV/0!	#DIV/0!	#DIV/0!	6	X6	#DIV/0!	#DIV/0!	#DIV/0!	6	X6	#DIV/0!	#DIV/0!	#DIV/0!	6	X6	#DIV/0!	#DIV/0!	#DIV/0!	6	X6	#DIV/0!	#DIV/0!	#DIV/0!	6	X6	#DIV/0!	#DIV/0!	#DIV/0!	6	X6	#DIV/0!	#DIV/0!	#DIV/0!	6	X6	#DIV/0!	#DIV/0!	#DIV/0!	6	X6	#DIV/0!	#DIV/0!	#DIV/0!
7	X7		0	#DIV/0!	7	X7	#DIV/0!	#DIV/0!	#DIV/0!	7	X7	#DIV/0!	#DIV/0!	#DIV/0!	7	X7	#DIV/0!	#DIV/0!	#DIV/0!	7	X7	#DIV/0!	#DIV/0!	#DIV/0!	7	X7	#DIV/0!	#DIV/0!	#DIV/0!	7	X7	#DIV/0!	#DIV/0!	#DIV/0!	7	X7	#DIV/0!	#DIV/0!	#DIV/0!	7	X7	#DIV/0!	#DIV/0!	#DIV/0!	7	X7	#DIV/0!	#DIV/0!	#DIV/0!
8	X8		0	#DIV/0!	8	X8	#DIV/0!	#DIV/0!	#DIV/0!	8	X8	#DIV/0!	#DIV/0!	#DIV/0!	8	X8	#DIV/0!	#DIV/0!	#DIV/0!	8	X8	#DIV/0!	#DIV/0!	#DIV/0!	8	X8	#DIV/0!	#DIV/0!	#DIV/0!	8	X8	#DIV/0!	#DIV/0!	#DIV/0!	8	X8	#DIV/0!	#DIV/0!	#DIV/0!	8	X8	#DIV/0!	#DIV/0!	#DIV/0!	8	X8	#DIV/0!	#DIV/0!	#DIV/0!
9	X9		0	#DIV/0!	9	X9	#DIV/0!	#DIV/0!	#DIV/0!	9	X9	#DIV/0!	#DIV/0!	#DIV/0!	9	X9	#DIV/0!	#DIV/0!	#DIV/0!	9	X9	#DIV/0!	#DIV/0!	#DIV/0!	9	X9	#DIV/0!	#DIV/0!	#DIV/0!	9	X9	#DIV/0!	#DIV/0!	#DIV/0!	9	X9	#DIV/0!	#DIV/0!	#DIV/0!	9	X9	#DIV/0!	#DIV/0!	#DIV/0!	9	X9	#DIV/0!	#DIV/0!	#DIV/0!
10	X10		0	#DIV/0!	10	X10	#DIV/0!	#DIV/0!	#DIV/0!	10	X10	#DIV/0!	#DIV/0!	#DIV/0!	10	X10	#DIV/0!	#DIV/0!	#DIV/0!	10	X10	#DIV/0!	#DIV/0!	#DIV/0!	10	X10	#DIV/0!	#DIV/0!	#DIV/0!	10	X10	#DIV/0!	#DIV/0!	#DIV/0!	10	X10	#DIV/0!	#DIV/0!	#DIV/0!	10	X10	#DIV/0!	#DIV/0!	#DIV/0!	10	X10	#DIV/0!	#DIV/0!	#DIV/0!
11	X11		0	#DIV/0!	11	X11	#DIV/0!	#DIV/0!	#DIV/0!	11	X11	#DIV/0!	#DIV/0!	#DIV/0!	11	X11	#DIV/0!	#DIV/0!	#DIV/0!	11	X11	#DIV/0!	#DIV/0!	#DIV/0!	11	X11	#DIV/0!	#DIV/0!	#DIV/0!	11	X11	#DIV/0!	#DIV/0!	#DIV/0!	11	X11	#DIV/0!	#DIV/0!	#DIV/0!	11	X11	#DIV/0!	#DIV/0!	#DIV/0!	11	X11	#DIV/0!	#DIV/0!	#DIV/0!
12	X12		0	#DIV/0!	12	X12	#DIV/0!	0	#DIV/0!	12	X12	#DIV/0!	0	#DIV/0!	12	X12	#DIV/0!	0	#DIV/0!	12	X12	#DIV/0!	0	#DIV/0!	12	X12	#DIV/0!	0	#DIV/0!	12	X12	#DIV/0!	0	#DIV/0!	12	X12	#DIV/0!	0	#DIV/0!	12	X12	#DIV/0!	0	#DIV/0!	12	X12	#DIV/0!	0	#DIV/0!
D	XD	0	0	#DIV/0!	D	XD	#DIV/0!	#DIV/0!	#DIV/0!	D	XD	#DIV/0!	#DIV/0!	#DIV/0!	D	XD	#DIV/0!	#DIV/0!	#DIV/0!	D	XD	#DIV/0!	#DIV/0!	#DIV/0!	D	XD	#DIV/0!	#DIV/0!	#DIV/0!	D	XD	#DIV/0!	#DIV/0!	#DIV/0!	D	XD	#DIV/0!	#DIV/0!	#DIV/0!	D	XD	#DIV/0!	#DIV/0!	#DIV/0!	D	XD	#DIV/0!	#DIV/0!	#DIV/0!
		Σ (Xi+1 / 2^i)	0				Σ (Xi+1 / 2^i)	#DIV/0!				Σ (Xi+1 / 2^i)	#DIV/0!				Σ (Xi+1 / 2^i)	#DIV/0!				Σ (Xi+1 / 2^i)	#DIV/0!				Σ (Xi+1 / 2^i)	#DIV/0!				Σ (Xi+1 / 2^i)	#DIV/0!				Σ (Xi+1 / 2^i)	#DIV/0!				Σ (Xi+1 / 2^i)	#DIV/0!				Σ (Xi+1 / 2^i)	#DIV/0!
		Φ	#DIV/0!				Φ	#DIV/0!				Φ	#DIV/0!				Φ	#DIV/0!				Φ	#DIV/0!				Φ	#DIV/0!				Φ	#DIV/0!				Φ	#DIV/0!				Φ	#DIV/0!				Φ	#DIV/0!
For D Divisions	Φ1	Copy Data			For D Divisions	Φ2				For D Divisions	Φ3				For D Divisions	Φ4				For D Divisions	Φ5				For D Divisions	Φ6				For D Divisions	Φ7				For D Divisions	Φ8				For D Divisions	Φ9				For D Divisions	Φ10
i = 1 to D	D=	Viability =			i = 1 to D	D=	Viability =			i = 1 to D	D=	Viability =			i = 1 to D	D=	Viability =			i = 1 to D	D=	Viability =			i = 1 to D	D=	Viability =			i = 1 to D	D=	Viability =			i = 1 to D	D=	Viability =			i = 1 to D	D=	Viability =			i = 1 to D	D=	Viability =
i	Xi	Xi Value	Xi+1 / 2^i	Xi''	i	Xi	Xi Value	Xi+1 / 2^i	Xi''	i	Xi	Xi Value	Xi+1 / 2^i	Xi''	i	Xi	Xi Value	Xi+1 / 2^i	Xi''	i	Xi	Xi Value	Xi+1 / 2^i	Xi''	i	Xi	Xi Value	Xi+1 / 2^i	Xi''	i	Xi	Xi Value	Xi+1 / 2^i	Xi''	i	Xi	Xi Value	Xi+1 / 2^i	Xi''	i	Xi	Xi Value	Xi+1 / 2^i	Xi''	i	Xi	Xi Value	Xi+1 / 2^i	Xi''
1	X1		0	#DIV/0!	1	X1	#DIV/0!	#DIV/0!	#DIV/0!	1	X1	#DIV/0!	#DIV/0!	#DIV/0!	1	X1	#DIV/0!	#DIV/0!	#DIV/0!	1	X1	#DIV/0!	#DIV/0!	#DIV/0!	1	X1	#DIV/0!	#DIV/0!	#DIV/0!	1	X1	#DIV/0!	#DIV/0!	#DIV/0!	1	X1	#DIV/0!	#DIV/0!	#DIV/0!	1	X1	#DIV/0!	#DIV/0!	#DIV/0!	1	X1	#DIV/0!	#DIV/0!	#DIV/0!
2	X2		0	#DIV/0!	2	X2	#DIV/0!	#DIV/0!	#DIV/0!	2	X2	#DIV/0!	#DIV/0!	#DIV/0!	2	X2	#DIV/0!	#DIV/0!	#DIV/0!	2	X2	#DIV/0!	#DIV/0!	#DIV/0!	2	X2	#DIV/0!	#DIV/0!	#DIV/0!	2	X2	#DIV/0!	#DIV/0!	#DIV/0!	2	X2	#DIV/0!	#DIV/0!	#DIV/0!	2	X2	#DIV/0!	#DIV/0!	#DIV/0!	2	X2	#DIV/0!	#DIV/0!	#DIV/0!
3	X3		0	#DIV/0!	3	X3	#DIV/0!	#DIV/0!	#DIV/0!	3	X3	#DIV/0!	#DIV/0!	#DIV/0!	3	X3	#DIV/0!	#DIV/0!	#DIV/0!	3	X3	#DIV/0!	#DIV/0!	#DIV/0!	3	X3	#DIV/0!	#DIV/0!	#DIV/0!	3	X3	#DIV/0!	#DIV/0!	#DIV/0!	3	X3	#DIV/0!	#DIV/0!	#DIV/0!	3	X3	#DIV/0!	#DIV/0!	#DIV/0!	3	X3	#DIV/0!	#DIV/0!	#DIV/0!
4	X4		0	#DIV/0!	4	X4	#DIV/0!	#DIV/0!	#DIV/0!	4	X4	#DIV/0!	#DIV/0!	#DIV/0!	4	X4	#DIV/0!	#DIV/0!	#DIV/0!	4	X4	#DIV/0!	#DIV/0!	#DIV/0!	4	X4	#DIV/0!	#DIV/0!	#DIV/0!	4	X4	#DIV/0!	#DIV/0!	#DIV/0!	4	X4	#DIV/0!	#DIV/0!	#DIV/0!	4	X4	#DIV/0!	#DIV/0!	#DIV/0!	4	X4	#DIV/0!	#DIV/0!	#DIV/0!
5	X5		0	#DIV/0!	5	X5	#DIV/0!	#DIV/0!	#DIV/0!	5	X5	#DIV/0!	#DIV/0!	#DIV/0!	5	X5	#DIV/0!	#DIV/0!	#DIV/0!	5	X5	#DIV/0!	#DIV/0!	#DIV/0!	5	X5	#DIV/0!	#DIV/0!	#DIV/0!	5	X5	#DIV/0!	#DIV/0!	#DIV/0!	5	X5	#DIV/0!	#DIV/0!	#DIV/0!	5	X5	#DIV/0!	#DIV/0!	#DIV/0!	5	X5	#DIV/0!	#DIV/0!	#DIV/0!
6	X6		0	#DIV/0!	6	X6	#DIV/0!	#DIV/0!	#DIV/0!	6	X6	#DIV/0!	#DIV/0!	#DIV/0!	6	X6	#DIV/0!	#DIV/0!	#DIV/0!	6	X6	#DIV/0!	#DIV/0!	#DIV/0!	6	X6	#DIV/0!	#DIV/0!	#DIV/0!	6	X6	#DIV/0!	#DIV/0!	#DIV/0!	6	X6	#DIV/0!	#DIV/0!	#DIV/0!	6	X6	#DIV/0!	#DIV/0!	#DIV/0!	6	X6	#DIV/0!	#DIV/0!	#DIV/0!
7	X7		0	#DIV/0!	7	X7	#DIV/0!	#DIV/0!	#DIV/0!	7	X7	#DIV/0!	#DIV/0!	#DIV/0!	7	X7	#DIV/0!	#DIV/0!	#DIV/0!	7	X7	#DIV/0!	#DIV/0!	#DIV/0!	7	X7	#DIV/0!	#DIV/0!	#DIV/0!	7	X7	#DIV/0!	#DIV/0!	#DIV/0!	7	X7	#DIV/0!	#DIV/0!	#DIV/0!	7	X7	#DIV/0!	#DIV/0!	#DIV/0!	7	X7	#DIV/0!	#DIV/0!	#DIV/0!
8	X8		0	#DIV/0!	8	X8	#DIV/0!	#DIV/0!	#DIV/0!	8	X8	#DIV/0!	#DIV/0!	#DIV/0!	8	X8	#DIV/0!	#DIV/0!	#DIV/0!	8	X8	#DIV/0!	#DIV/0!	#DIV/0!	8	X8	#DIV/0!	#DIV/0!	#DIV/0!	8	X8	#DIV/0!	#DIV/0!	#DIV/0!	8	X8	#DIV/0!	#DIV/0!	#DIV/0!	8	X8	#DIV/0!	#DIV/0!	#DIV/0!	8	X8	#DIV/0!	#DIV/0!	#DIV/0!
9	X9		0	#DIV/0!	9	X9	#DIV/0!	#DIV/0!	#DIV/0!	9	X9	#DIV/0!	#DIV/0!	#DIV/0!	9	X9	#DIV/0!	#DIV/0!	#DIV/0!	9	X9	#DIV/0!	#DIV/0!	#DIV/0!	9	X9	#DIV/0!	#DIV/0!	#DIV/0!	9	X9	#DIV/0!	#DIV/0!	#DIV/0!	9	X9	#DIV/0!	#DIV/0!	#DIV/0!	9	X9	#DIV/0!	#DIV/0!	#DIV/0!	9	X9	#DIV/0!	#DIV/0!	#DIV/0!
10	X10		0	#DIV/0!	10	X10	#DIV/0!	#DIV/0!	#DIV/0!	10	X10	#DIV/0!	#DIV/0!	#DIV/0!	10	X10	#DIV/0!	#DIV/0!	#DIV/0!	10	X10	#DIV/0!	#DIV/0!	#DIV/0!	10	X10	#DIV/0!	#DIV/0!	#DIV/0!	10	X10	#DIV/0!	#DIV/0!	#DIV/0!	10	X10	#DIV/0!	#DIV/0!	#DIV/0!	10	X10	#DIV/0!	#DIV/0!	#DIV/0!	10	X10	#DIV/0!	#DIV/0!	#DIV/0!
11	X11		0	#DIV/0!	11	X11	#DIV/0!	#DIV/0!	#DIV/0!	11	X11	#DIV/0!	#DIV/0!	#DIV/0!	11	X11	#DIV/0!	#DIV/0!	#DIV/0!	11	X11	#DIV/0!	#DIV/0!	#DIV/0!	11	X11	#DIV/0!	#DIV/0!	#DIV/0!	11	X11	#DIV/0!	#DIV/0!	#DIV/0!	11	X11	#DIV/0!	#DIV/0!	#DIV/0!	11	X11	#DIV/0!	#DIV/0!	#DIV/0!	11	X11	#DIV/0!	#DIV/0!	#DIV/0!
12	X12		0	#DIV/0!	12	X12	#DIV/0!	0	#DIV/0!	12	X12	#DIV/0!	0	#DIV/0!	12	X12	#DIV/0!	0	#DIV/0!	12	X12	#DIV/0!	0	#DIV/0!	12	X12	#DIV/0!	0	#DIV/0!	12	X12	#DIV/0!	0	#DIV/0!	12	X12	#DIV/0!	0	#DIV/0!	12	X12	#DIV/0!	0	#DIV/0!	12	X12	#DIV/0!	0	#DIV/0!
D	XD	0	0	#DIV/0!	D	XD	#DIV/0!	#DIV/0!	#DIV/0!	D	XD	#DIV/0!	#DIV/0!	#DIV/0!	D	XD	#DIV/0!	#DIV/0!	#DIV/0!	D	XD	#DIV/0!	#DIV/0!	#DIV/0!	D	XD	#DIV/0!	#DIV/0!	#DIV/0!	D	XD	#DIV/0!	#DIV/0!	#DIV/0!	D	XD	#DIV/0!	#DIV/0!	#DIV/0!	D	XD	#DIV/0!	#DIV/0!	#DIV/0!	D	XD	#DIV/0!	#DIV/0!	#DIV/0!
		Σ (Xi+1 / 2^i)	0				Σ (Xi+1 / 2^i)	#DIV/0!				Σ (Xi+1 / 2^i)	#DIV/0!				Σ (Xi+1 / 2^i)	#DIV/0!				Σ (Xi+1 / 2^i)	#DIV/0!				Σ (Xi+1 / 2^i)	#DIV/0!				Σ (Xi+1 / 2^i)	#DIV/0!				Σ (Xi+1 / 2^i)	#DIV/0!				Σ (Xi+1 / 2^i)	#DIV/0!				Σ (Xi+1 / 2^i)	#DIV/0!
		Φ	#DIV/0!				Φ	#DIV/0!				Φ	#DIV/0!				Φ	#DIV/0!				Φ	#DIV/0!				Φ	#DIV/0!				Φ	#DIV/0!				Φ	#DIV/0!				Φ	#DIV/0!				Φ	#DIV/0!
For D Divisions	Φ1	Copy Data			For D Divisions	Φ2				For D Divisions	Φ3				For D Divisions	Φ4				For D Divisions	Φ5				For D Divisions	Φ6				For D Divisions	Φ7				For D Divisions	Φ8				For D Divisions	Φ9				For D Divisions	Φ10
i = 1 to D	D=	Viability =			i = 1 to D	D=	Viability =			i = 1 to D	D=	Viability =			i = 1 to D	D=	Viability =			i = 1 to D	D=	Viability =			i = 1 to D	D=	Viability =			i = 1 to D	D=	Viability =			i = 1 to D	D=	Viability =			i = 1 to D	D=	Viability =			i = 1 to D	D=	Viability =
i	Xi	Xi Value	Xi+1 / 2^i	Xi''	i	Xi	Xi Value	Xi+1 / 2^i	Xi''	i	Xi	Xi Value	Xi+1 / 2^i	Xi''	i	Xi	Xi Value	Xi+1 / 2^i	Xi''	i	Xi	Xi Value	Xi+1 / 2^i	Xi''	i	Xi	Xi Value	Xi+1 / 2^i	Xi''	i	Xi	Xi Value	Xi+1 / 2^i	Xi''	i	Xi	Xi Value	Xi+1 / 2^i	Xi''	i	Xi	Xi Value	Xi+1 / 2^i	Xi''	i	Xi	Xi Value	Xi+1 / 2^i	Xi''
1	X1		0	#DIV/0!	1	X1	#DIV/0!	#DIV/0!	#DIV/0!	1	X1	#DIV/0!	#DIV/0!	#DIV/0!	1	X1	#DIV/0!	#DIV/0!	#DIV/0!	1	X1	#DIV/0!	#DIV/0!	#DIV/0!	1	X1	#DIV/0!	#DIV/0!	#DIV/0!	1	X1	#DIV/0!	#DIV/0!	#DIV/0!	1	X1	#DIV/0!	#DIV/0!	#DIV/0!	1	X1	#DIV/0!	#DIV/0!	#DIV/0!	1	X1	#DIV/0!	#DIV/0!	#DIV/0!
2	X2		0	#DIV/0!	2	X2	#DIV/0!	#DIV/0!	#DIV/0!	2	X2	#DIV/0!	#DIV/0!	#DIV/0!	2	X2	#DIV/0!	#DIV/0!	#DIV/0!	2	X2	#DIV/0!	#DIV/0!	#DIV/0!	2	X2	#DIV/0!	#DIV/0!	#DIV/0!	2	X2	#DIV/0!	#DIV/0!	#DIV/0!	2	X2	#DIV/0!	#DIV/0!	#DIV/0!	2	X2	#DIV/0!	#DIV/0!	#DIV/0!	2	X2	#DIV/0!	#DIV/0!	#DIV/0!
3	X3		0	#DIV/0!	3	X3	#DIV/0!	#DIV/0!	#DIV/0!	3	X3	#DIV/0!	#DIV/0!	#DIV/0!	3	X3	#DIV/0!	#DIV/0!	#DIV/0!	3	X3	#DIV/0!	#DIV/0!	#DIV/0!	3	X3	#DIV/0!	#DIV/0!	#DIV/0!	3	X3	#DIV/0!	#DIV/0!	#DIV/0!	3	X3	#DIV/0!	#DIV/0!	#DIV/0!	3	X3	#DIV/0!	#DIV/0!	#DIV/0!	3	X3	#DIV/0!	#DIV/0!	#DIV/0!
4	X4		0	#DIV/0!	4	X4	#DIV/0!	#DIV/0!	#DIV/0!	4	X4	#DIV/0!	#DIV/0!	#DIV/0!	4	X4	#DIV/0!	#DIV/0!	#DIV/0!	4	X4	#DIV/0!	#DIV/0!	#DIV/0!	4	X4	#DIV/0!	#DIV/0!	#DIV/0!	4	X4	#DIV/0!	#DIV/0!	#DIV/0!	4	X4	#DIV/0!	#DIV/0!	#DIV/0!	4	X4	#DIV/0!	#DIV/0!	#DIV/0!	4	X4	#DIV/0!	#DIV/0!	#DIV/0!
5	X5		0	#DIV/0!	5	X5	#DIV/0!	#DIV/0!	#DIV/0!	5	X5	#DIV/0!	#DIV/0!	#DIV/0!	5	X5	#DIV/0!	#DIV/0!	#DIV/0!	5	X5	#DIV/0!	#DIV/0!	#DIV/0!	5	X5	#DIV/0!	#DIV/0!	#DIV/0!	5	X5	#DIV/0!	#DIV/0!	#DIV/0!	5	X5	#DIV/0!	#DIV/0!	#DIV/0!	5	X5	#DIV/0!	#DIV/0!	#DIV/0!	5	X5	#DIV/0!	#DIV/0!	#DIV/0!
6	X6		0	#DIV/0!	6	X6	#DIV/0!	#DIV/0!	#DIV/0!	6	X6	#DIV/0!	#DIV/0!	#DIV/0!	6	X6	#DIV/0!	#DIV/0!	#DIV/0!	6	X6	#DIV/0!	#DIV/0!	#DIV/0!	6	X6	#DIV/0!	#DIV/0!	#DIV/0!	6	X6	#DIV/0!	#DIV/0!	#DIV/0!	6	X6	#DIV/0!	#DIV/0!	#DIV/0!	6	X6	#DIV/0!	#DIV/0!	#DIV/0!	6	X6	#DIV/0!	#DIV/0!	#DIV/0!
7	X7		0	#DIV/0!	7	X7	#DIV/0!	#DIV/0!	#DIV/0!	7	X7	#DIV/0!	#DIV/0!	#DIV/0!	7	X7	#DIV/0!	#DIV/0!	#DIV/0!	7	X7	#DIV/0!	#DIV/0!	#DIV/0!	7	X7	#DIV/0!	#DIV/0!	#DIV/0!	7	X7	#DIV/0!	#DIV/0!	#DIV/0!	7	X7	#DIV/0!	#DIV/0!	#DIV/0!	7	X7	#DIV/0!	#DIV/0!	#DIV/0!	7	X7	#DIV/0!	#DIV/0!	#DIV/0!
8	X8		0	#DIV/0!	8	X8	#DIV/0!	#DIV/0!	#DIV/0!	8	X8	#DIV/0!	#DIV/0!	#DIV/0!	8	X8	#DIV/0!	#DIV/0!	#DIV/0!	8	X8	#DIV/0!	#DIV/0!	#DIV/0!	8	X8	#DIV/0!	#DIV/0!	#DIV/0!	8	X8	#DIV/0!	#DIV/0!	#DIV/0!	8	X8	#DIV/0!	#DIV/0!	#DIV/0!	8	X8	#DIV/0!	#DIV/0!	#DIV/0!	8	X8	#DIV/0!	#DIV/0!	#DIV/0!
9	X9		0	#DIV/0!	9	X9	#DIV/0!	#DIV/0!	#DIV/0!	9	X9	#DIV/0!	#DIV/0!	#DIV/0!	9	X9	#DIV/0!	#DIV/0!	#DIV/0!	9	X9	#DIV/0!	#DIV/0!	#DIV/0!	9	X9	#DIV/0!	#DIV/0!	#DIV/0!	9	X9	#DIV/0!	#DIV/0!	#DIV/0!	9	X9	#DIV/0!	#DIV/0!	#DIV/0!	9	X9	#DIV/0!	#DIV/0!	#DIV/0!	9	X9	#DIV/0!	#DIV/0!	#DIV/0!
10	X10		0	#DIV/0!	10	X10	#DIV/0!	#DIV/0!	#DIV/0!	10	X10	#DIV/0!	#DIV/0!	#DIV/0!	10	X10	#DIV/0!	#DIV/0!	#DIV/0!	10	X10	#DIV/0!	#DIV/0!	#DIV/0!	10	X10	#DIV/0!	#DIV/0!	#DIV/0!	10	X10	#DIV/0!	#DIV/0!	#DIV/0!	10	X10	#DIV/0!	#DIV/0!	#DIV/0!	10	X10	#DIV/0!	#DIV/0!	#DIV/0!	10	X10	#DIV/0!	#DIV/0!	#DIV/0!
11	X11		0	#DIV/0!	11	X11	#DIV/0!	#DIV/0!	#DIV/0!	11	X11	#DIV/0!	#DIV/0!	#DIV/0!	11	X11	#DIV/0!	#DIV/0!	#DIV/0!	11	X11	#DIV/0!	#DIV/0!	#DIV/0!	11	X11	#DIV/0!	#DIV/0!	#DIV/0!	11	X11	#DIV/0!	#DIV/0!	#DIV/0!	11	X11	#DIV/0!	#DIV/0!	#DIV/0!	11	X11	#DIV/0!	#DIV/0!	#DIV/0!	11	X11	#DIV/0!	#DIV/0!	#DIV/0!
12	X12		0	#DIV/0!	12	X12	#DIV/0!	0	#DIV/0!	12	X12	#DIV/0!	0	#DIV/0!	12	X12	#DIV/0!	0	#DIV/0!	12	X12	#DIV/0!	0	#DIV/0!	12	X12	#DIV/0!	0	#DIV/0!	12	X12	#DIV/0!	0	#DIV/0!	12	X12	#DIV/0!	0	#DIV/0!	12	X12	#DIV/0!	0	#DIV/0!	12	X12	#DIV/0!	0	#DIV/0!
D	XD	0	0	#DIV/0!	D	XD	#DIV/0!	#DIV/0!	#DIV/0!	D	XD	#DIV/0!	#DIV/0!	#DIV/0!	D	XD	#DIV/0!	#DIV/0!	#DIV/0!	D	XD	#DIV/0!	#DIV/0!	#DIV/0!	D	XD	#DIV/0!	#DIV/0!	#DIV/0!	D	XD	#DIV/0!	#DIV/0!	#DIV/0!	D	XD	#DIV/0!	#DIV/0!	#DIV/0!	D	XD	#DIV/0!	#DIV/0!	#DIV/0!	D	XD	#DIV/0!	#DIV/0!	#DIV/0!
		Σ (Xi+1 / 2^i)	0				Σ (Xi+1 / 2^i)	#DIV/0!				Σ (Xi+1 / 2^i)	#DIV/0!				Σ (Xi+1 / 2^i)	#DIV/0!				Σ (Xi+1 / 2^i)	#DIV/0!				Σ (Xi+1 / 2^i)	#DIV/0!				Σ (Xi+1 / 2^i)	#DIV/0!				Σ (Xi+1 / 2^i)	#DIV/0!				Σ (Xi+1 / 2^i)	#DIV/0!				Σ (Xi+1 / 2^i)	#DIV/0!
		Φ	#DIV/0!				Φ	#DIV/0!				Φ	#DIV/0!				Φ	#DIV/0!				Φ	#DIV/0!				Φ	#DIV/0!				Φ	#DIV/0!				Φ	#DIV/0!				Φ	#DIV/0!				Φ	#DIV/0!
For D Divisions	Φ1	Copy Data			For D Divisions	Φ2				For D Divisions	Φ3				For D Divisions	Φ4				For D Divisions	Φ5				For D Divisions	Φ6				For D Divisions	Φ7				For D Divisions	Φ8				For D Divisions	Φ9				For D Divisions	Φ10
i = 1 to D	D=	Viability =			i = 1 to D	D=	Viability =			i = 1 to D	D=	Viability =			i = 1 to D	D=	Viability =			i = 1 to D	D=	Viability =			i = 1 to D	D=	Viability =			i = 1 to D	D=	Viability =			i = 1 to D	D=	Viability =			i = 1 to D	D=	Viability =			i = 1 to D	D=	Viability =
i	Xi	Xi Value	Xi+1 / 2^i	Xi''	i	Xi	Xi Value	Xi+1 / 2^i	Xi''	i	Xi	Xi Value	Xi+1 / 2^i	Xi''	i	Xi	Xi Value	Xi+1 / 2^i	Xi''	i	Xi	Xi Value	Xi+1 / 2^i	Xi''	i	Xi	Xi Value	Xi+1 / 2^i	Xi''	i	Xi	Xi Value	Xi+1 / 2^i	Xi''	i	Xi	Xi Value	Xi+1 / 2^i	Xi''	i	Xi	Xi Value	Xi+1 / 2^i	Xi''	i	Xi	Xi Value	Xi+1 / 2^i	Xi''
1	X1		0	#DIV/0!	1	X1	#DIV/0!	#DIV/0!	#DIV/0!	1	X1	#DIV/0!	#DIV/0!	#DIV/0!	1	X1	#DIV/0!	#DIV/0!	#DIV/0!	1	X1	#DIV/0!	#DIV/0!	#DIV/0!	1	X1	#DIV/0!	#DIV/0!	#DIV/0!	1	X1	#DIV/0!	#DIV/0!	#DIV/0!	1	X1	#DIV/0!	#DIV/0!	#DIV/0!	1	X1	#DIV/0!	#DIV/0!	#DIV/0!	1	X1	#DIV/0!	#DIV/0!	#DIV/0!
2	X2		0	#DIV/0!	2	X2	#DIV/0!	#DIV/0!	#DIV/0!	2	X2	#DIV/0!	#DIV/0!	#DIV/0!	2	X2	#DIV/0!	#DIV/0!	#DIV/0!	2	X2	#DIV/0!	#DIV/0!	#DIV/0!	2	X2	#DIV/0!	#DIV/0!	#DIV/0!	2	X2	#DIV/0!	#DIV/0!	#DIV/0!	2	X2	#DIV/0!	#DIV/0!	#DIV/0!	2	X2	#DIV/0!	#DIV/0!	#DIV/0!	2	X2	#DIV/0!	#DIV/0!	#DIV/0!
3	X3		0	#DIV/0!	3	X3	#DIV/0!	#DIV/0!	#DIV/0!	3	X3	#DIV/0!	#DIV/0!	#DIV/0!	3	X3	#DIV/0!	#DIV/0!	#DIV/0!	3	X3	#DIV/0!	#DIV/0!	#DIV/0!	3	X3	#DIV/0!	#DIV/0!	#DIV/0!	3	X3	#DIV/0!	#DIV/0!	#DIV/0!	3	X3	#DIV/0!	#DIV/0!	#DIV/0!	3	X3	#DIV/0!	#DIV/0!	#DIV/0!	3	X3	#DIV/0!	#DIV/0!	#DIV/0!
4	X4		0	#DIV/0!	4	X4	#DIV/0!	#DIV/0!	#DIV/0!	4	X4	#DIV/0!	#DIV/0!	#DIV/0!	4	X4	#DIV/0!	#DIV/0!	#DIV/0!	4	X4	#DIV/0!	#DIV/0!	#DIV/0!	4	X4	#DIV/0!	#DIV/0!	#DIV/0!	4	X4	#DIV/0!	#DIV/0!	#DIV/0!	4	X4	#DIV/0!	#DIV/0!	#DIV/0!	4	X4	#DIV/0!	#DIV/0!	#DIV/0!	4	X4	#DIV/0!	#DIV/0!	#DIV/0!
5	X5		0	#DIV/0!	5	X5	#DIV/0!	#DIV/0!	#DIV/0!	5	X5	#DIV/0!	#DIV/0!	#DIV/0!	5	X5	#DIV/0!	#DIV/0!	#DIV/0!	5	X5	#DIV/0!	#DIV/0!	#DIV/0!	5	X5	#DIV/0!	#DIV/0!	#DIV/0!	5	X5	#DIV/0!	#DIV/0!	#DIV/0!	5	X5	#DIV/0!	#DIV/0!	#DIV/0!	5	X5	#DIV/0!	#DIV/0!	#DIV/0!	5	X5	#DIV/0!	#DIV/0!	#DIV/0!
6	X6		0	#DIV/0!	6	X6	#DIV/0!	#DIV/0!	#DIV/0!	6	X6	#DIV/0!	#DIV/0!	#DIV/0!	6	X6	#DIV/0!	#DIV/0!	#DIV/0!	6	X6	#DIV/0!	#DIV/0!	#DIV/0!	6	X6	#DIV/0!	#DIV/0!	#DIV/0!	6	X6	#DIV/0!	#DIV/0!	#DIV/0!	6	X6	#DIV/0!	#DIV/0!	#DIV/0!	6	X6	#DIV/0!	#DIV/0!	#DIV/0!	6	X6	#DIV/0!	#DIV/0!	#DIV/0!
7	X7		0	#DIV/0!	7	X7	#DIV/0!	#DIV/0!	#DIV/0!	7	X7	#DIV/0!	#DIV/0!	#DIV/0!	7	X7	#DIV/0!	#DIV/0!	#DIV/0!	7	X7	#DIV/0!	#DIV/0!	#DIV/0!	7	X7	#DIV/0!	#DIV/0!	#DIV/0!	7	X7	#DIV/0!	#DIV/0!	#DIV/0!	7	X7	#DIV/0!	#DIV/0!	#DIV/0!	7	X7	#DIV/0!	#DIV/0!	#DIV/0!	7	X7	#DIV/0!	#DIV/0!	#DIV/0!
8	X8		0	#DIV/0!	8	X8	#DIV/0!	#DIV/0!	#DIV/0!	8	X8	#DIV/0!	#DIV/0!	#DIV/0!	8	X8	#DIV/0!	#DIV/0!	#DIV/0!	8	X8	#DIV/0!	#DIV/0!	#DIV/0!	8	X8	#DIV/0!	#DIV/0!	#DIV/0!	8	X8	#DIV/0!	#DIV/0!	#DIV/0!	8	X8	#DIV/0!	#DIV/0!	#DIV/0!	8	X8	#DIV/0!	#DIV/0!	#DIV/0!	8	X8	#DIV/0!	#DIV/0!	#DIV/0!
9	X9		0	#DIV/0!	9	X9	#DIV/0!	#DIV/0!	#DIV/0!	9	X9	#DIV/0!	#DIV/0!	#DIV/0!	9	X9	#DIV/0!	#DIV/0!	#DIV/0!	9	X9	#DIV/0!	#DIV/0!	#DIV/0!	9	X9	#DIV/0!	#DIV/0!	#DIV/0!	9	X9	#DIV/0!	#DIV/0!	#DIV/0!	9	X9	#DIV/0!	#DIV/0!	#DIV/0!	9	X9	#DIV/0!	#DIV/0!	#DIV/0!	9	X9	#DIV/0!	#DIV/0!	#DIV/0!
10	X10		0	#DIV/0!	10	X10	#DIV/0!	#DIV/0!	#DIV/0!	10	X10	#DIV/0!	#DIV/0!	#DIV/0!	10	X10	#DIV/0!	#DIV/0!	#DIV/0!	10	X10	#DIV/0!	#DIV/0!	#DIV/0!	10	X10	#DIV/0!	#DIV/0!	#DIV/0!	10	X10	#DIV/0!	#DIV/0!	#DIV/0!	10	X10	#DIV/0!	#DIV/0!	#DIV/0!	10	X10	#DIV/0!	#DIV/0!	#DIV/0!	10	X10	#DIV/0!	#DIV/0!	#DIV/0!
11	X11		0	#DIV/0!	11	X11	#DIV/0!	#DIV/0!	#DIV/0!	11	X11	#DIV/0!	#DIV/0!	#DIV/0!	11	X11	#DIV/0!	#DIV/0!	#DIV/0!	11	X11	#DIV/0!	#DIV/0!	#DIV/0!	11	X11	#DIV/0!	#DIV/0!	#DIV/0!	11	X11	#DIV/0!	#DIV/0!	#DIV/0!	11	X11	#DIV/0!	#DIV/0!	#DIV/0!	11	X11	#DIV/0!	#DIV/0!	#DIV/0!	11	X11	#DIV/0!	#DIV/0!	#DIV/0!
12	X12		0	#DIV/0!	12	X12	#DIV/0!	0	#DIV/0!	12	X12	#DIV/0!	0	#DIV/0!	12	X12	#DIV/0!	0	#DIV/0!	12	X12	#DIV/0!	0	#DIV/0!	12	X12	#DIV/0!	0	#DIV/0!	12	X12	#DIV/0!	0	#DIV/0!	12	X12	#DIV/0!	0	#DIV/0!	12	X12	#DIV/0!	0	#DIV/0!	12	X12	#DIV/0!	0	#DIV/0!
D	XD	0	0	#DIV/0!	D	XD	#DIV/0!	#DIV/0!	#DIV/0!	D	XD	#DIV/0!	#DIV/0!	#DIV/0!	D	XD	#DIV/0!	#DIV/0!	#DIV/0!	D	XD	#DIV/0!	#DIV/0!	#DIV/0!	D	XD	#DIV/0!	#DIV/0!	#DIV/0!	D	XD	#DIV/0!	#DIV/0!	#DIV/0!	D	XD	#DIV/0!	#DIV/0!	#DIV/0!	D	XD	#DIV/0!	#DIV/0!	#DIV/0!	D	XD	#DIV/0!	#DIV/0!	#DIV/0!
		Σ (Xi+1 / 2^i)	0				Σ (Xi+1 / 2^i)	#DIV/0!				Σ (Xi+1 / 2^i)	#DIV/0!				Σ (Xi+1 / 2^i)	#DIV/0!				Σ (Xi+1 / 2^i)	#DIV/0!				Σ (Xi+1 / 2^i)	#DIV/0!				Σ (Xi+1 / 2^i)	#DIV/0!				Σ (Xi+1 / 2^i)	#DIV/0!				Σ (Xi+1 / 2^i)	#DIV/0!				Σ (Xi+1 / 2^i)	#DIV/0!
		Φ	#DIV/0!				Φ	#DIV/0!				Φ	#DIV/0!				Φ	#DIV/0!				Φ	#DIV/0!				Φ	#DIV/0!				Φ	#DIV/0!				Φ	#DIV/0!				Φ	#DIV/0!				Φ	#DIV/0!
For D Divisions	Φ1	Copy Data			For D Divisions	Φ2				For D Divisions	Φ3				For D Divisions	Φ4				For D Divisions	Φ5				For D Divisions	Φ6				For D Divisions	Φ7				For D Divisions	Φ8				For D Divisions	Φ9				For D Divisions	Φ10
i = 1 to D	D=	Viability =			i = 1 to D	D=	Viability =			i = 1 to D	D=	Viability =			i = 1 to D	D=	Viability =			i = 1 to D	D=	Viability =			i = 1 to D	D=	Viability =			i = 1 to D	D=	Viability =			i = 1 to D	D=	Viability =			i = 1 to D	D=	Viability =			i = 1 to D	D=	Viability =
i	Xi	Xi Value	Xi+1 / 2^i	Xi''	i	Xi	Xi Value	Xi+1 / 2^i	Xi''	i	Xi	Xi Value	Xi+1 / 2^i	Xi''	i	Xi	Xi Value	Xi+1 / 2^i	Xi''	i	Xi	Xi Value	Xi+1 / 2^i	Xi''	i	Xi	Xi Value	Xi+1 / 2^i	Xi''	i	Xi	Xi Value	Xi+1 / 2^i	Xi''	i	Xi	Xi Value	Xi+1 / 2^i	Xi''	i	Xi	Xi Value	Xi+1 / 2^i	Xi''	i	Xi	Xi Value	Xi+1 / 2^i	Xi''
1	X1		0	#DIV/0!	1	X1	#DIV/0!	#DIV/0!	#DIV/0!	1	X1	#DIV/0!	#DIV/0!	#DIV/0!	1	X1	#DIV/0!	#DIV/0!	#DIV/0!	1	X1	#DIV/0!	#DIV/0!	#DIV/0!	1	X1	#DIV/0!	#DIV/0!	#DIV/0!	1	X1	#DIV/0!	#DIV/0!	#DIV/0!	1	X1	#DIV/0!	#DIV/0!	#DIV/0!	1	X1	#DIV/0!	#DIV/0!	#DIV/0!	1	X1	#DIV/0!	#DIV/0!	#DIV/0!
2	X2		0	#DIV/0!	2	X2	#DIV/0!	#DIV/0!	#DIV/0!	2	X2	#DIV/0!	#DIV/0!	#DIV/0!	2	X2	#DIV/0!	#DIV/0!	#DIV/0!	2	X2	#DIV/0!	#DIV/0!	#DIV/0!	2	X2	#DIV/0!	#DIV/0!	#DIV/0!	2	X2	#DIV/0!	#DIV/0!	#DIV/0!	2	X2	#DIV/0!	#DIV/0!	#DIV/0!	2	X2	#DIV/0!	#DIV/0!	#DIV/0!	2	X2	#DIV/0!	#DIV/0!	#DIV/0!
3	X3		0	#DIV/0!	3	X3	#DIV/0!	#DIV/0!	#DIV/0!	3	X3	#DIV/0!	#DIV/0!	#DIV/0!	3	X3	#DIV/0!	#DIV/0!	#DIV/0!	3	X3	#DIV/0!	#DIV/0!	#DIV/0!	3	X3	#DIV/0!	#DIV/0!	#DIV/0!	3	X3	#DIV/0!	#DIV/0!	#DIV/0!	3	X3	#DIV/0!	#DIV/0!	#DIV/0!	3	X3	#DIV/0!	#DIV/0!	#DIV/0!	3	X3	#DIV/0!	#DIV/0!	#DIV/0!
4	X4		0	#DIV/0!	4	X4	#DIV/0!	#DIV/0!	#DIV/0!	4	X4	#DIV/0!	#DIV/0!	#DIV/0!	4	X4	#DIV/0!	#DIV/0!	#DIV/0!	4	X4	#DIV/0!	#DIV/0!	#DIV/0!	4	X4	#DIV/0!	#DIV/0!	#DIV/0!	4	X4	#DIV/0!	#DIV/0!	#DIV/0!	4	X4	#DIV/0!	#DIV/0!	#DIV/0!	4	X4	#DIV/0!	#DIV/0!	#DIV/0!	4	X4	#DIV/0!	#DIV/0!	#DIV/0!
5	X5		0	#DIV/0!	5	X5	#DIV/0!	#DIV/0!	#DIV/0!	5	X5	#DIV/0!	#DIV/0!	#DIV/0!	5	X5	#DIV/0!	#DIV/0!	#DIV/0!	5	X5	#DIV/0!	#DIV/0!	#DIV/0!	5	X5	#DIV/0!	#DIV/0!	#DIV/0!	5	X5	#DIV/0!	#DIV/0!	#DIV/0!	5	X5	#DIV/0!	#DIV/0!	#DIV/0!	5	X5	#DIV/0!	#DIV/0!	#DIV/0!	5	X5	#DIV/0!	#DIV/0!	#DIV/0!
6	X6		0	#DIV/0!	6	X6	#DIV/0!	#DIV/0!	#DIV/0!	6	X6	#DIV/0!	#DIV/0!	#DIV/0!	6	X6	#DIV/0!	#DIV/0!	#DIV/0!	6	X6	#DIV/0!	#DIV/0!	#DIV/0!	6	X6	#DIV/0!	#DIV/0!	#DIV/0!	6	X6	#DIV/0!	#DIV/0!	#DIV/0!	6	X6	#DIV/0!	#DIV/0!	#DIV/0!	6	X6	#DIV/0!	#DIV/0!	#DIV/0!	6	X6	#DIV/0!	#DIV/0!	#DIV/0!
7	X7		0	#DIV/0!	7	X7	#DIV/0!	#DIV/0!	#DIV/0!	7	X7	#DIV/0!	#DIV/0!	#DIV/0!	7	X7	#DIV/0!	#DIV/0!	#DIV/0!	7	X7	#DIV/0!	#DIV/0!	#DIV/0!	7	X7	#DIV/0!	#DIV/0!	#DIV/0!	7	X7	#DIV/0!	#DIV/0!	#DIV/0!	7	X7	#DIV/0!	#DIV/0!	#DIV/0!	7	X7	#DIV/0!	#DIV/0!	#DIV/0!	7	X7	#DIV/0!	#DIV/0!	#DIV/0!
8	X8		0	#DIV/0!	8	X8	#DIV/0!	#DIV/0!	#DIV/0!	8	X8	#DIV/0!	#DIV/0!	#DIV/0!	8	X8	#DIV/0!	#DIV/0!	#DIV/0!	8	X8	#DIV/0!	#DIV/0!	#DIV/0!	8	X8	#DIV/0!	#DIV/0!	#DIV/0!	8	X8	#DIV/0!	#DIV/0!	#DIV/0!	8	X8	#DIV/0!	#DIV/0!	#DIV/0!	8	X8	#DIV/0!	#DIV/0!	#DIV/0!	8	X8	#DIV/0!	#DIV/0!	#DIV/0!
9	X9		0	#DIV/0!	9	X9	#DIV/0!	#DIV/0!	#DIV/0!	9	X9	#DIV/0!	#DIV/0!	#DIV/0!	9	X9	#DIV/0!	#DIV/0!	#DIV/0!	9	X9	#DIV/0!	#DIV/0!	#DIV/0!	9	X9	#DIV/0!	#DIV/0!	#DIV/0!	9	X9	#DIV/0!	#DIV/0!	#DIV/0!	9	X9	#DIV/0!	#DIV/0!	#DIV/0!	9	X9	#DIV/0!	#DIV/0!	#DIV/0!	9	X9	#DIV/0!	#DIV/0!	#DIV/0!
10	X10		0	#DIV/0!	10	X10	#DIV/0!	#DIV/0!	#DIV/0!	10	X10	#DIV/0!	#DIV/0!	#DIV/0!	10	X10	#DIV/0!	#DIV/0!	#DIV/0!	10	X10	#DIV/0!	#DIV/0!	#DIV/0!	10	X10	#DIV/0!	#DIV/0!	#DIV/0!	10	X10	#DIV/0!	#DIV/0!	#DIV/0!	10	X10	#DIV/0!	#DIV/0!	#DIV/0!	10	X10	#DIV/0!	#DIV/0!	#DIV/0!	10	X10	#DIV/0!	#DIV/0!	#DIV/0!
11	X11		0	#DIV/0!	11	X11	#DIV/0!	#DIV/0!	#DIV/0!	11	X11	#DIV/0!	#DIV/0!	#DIV/0!	11	X11	#DIV/0!	#DIV/0!	#DIV/0!	11	X11	#DIV/0!	#DIV/0!	#DIV/0!	11	X11	#DIV/0!	#DIV/0!	#DIV/0!	11	X11	#DIV/0!	#DIV/0!	#DIV/0!	11	X11	#DIV/0!	#DIV/0!	#DIV/0!	11	X11	#DIV/0!	#DIV/0!	#DIV/0!	11	X11	#DIV/0!	#DIV/0!	#DIV/0!
12	X12		0	#DIV/0!	12	X12	#DIV/0!	0	#DIV/0!	12	X12	#DIV/0!	0	#DIV/0!	12	X12	#DIV/0!	0	#DIV/0!	12	X12	#DIV/0!	0	#DIV/0!	12	X12	#DIV/0!	0	#DIV/0!	12	X12	#DIV/0!	0	#DIV/0!	12	X12	#DIV/0!	0	#DIV/0!	12	X12	#DIV/0!	0	#DIV/0!	12	X12	#DIV/0!	0	#DIV/0!
D	XD	0	0	#DIV/0!	D	XD	#DIV/0!	#DIV/0!	#DIV/0!	D	XD	#DIV/0!	#DIV/0!	#DIV/0!	D	XD	#DIV/0!	#DIV/0!	#DIV/0!	D	XD	#DIV/0!	#DIV/0!	#DIV/0!	D	XD	#DIV/0!	#DIV/0!	#DIV/0!	D	XD	#DIV/0!	#DIV/0!	#DIV/0!	D	XD	#DIV/0!	#DIV/0!	#DIV/0!	D	XD	#DIV/0!	#DIV/0!	#DIV/0!	D	XD	#DIV/0!	#DIV/0!	#DIV/0!
		Σ (Xi+1 / 2^i)	0				Σ (Xi+1 / 2^i)	#DIV/0!				Σ (Xi+1 / 2^i)	#DIV/0!				Σ (Xi+1 / 2^i)	#DIV/0!				Σ (Xi+1 / 2^i)	#DIV/0!				Σ (Xi+1 / 2^i)	#DIV/0!				Σ (Xi+1 / 2^i)	#DIV/0!				Σ (Xi+1 / 2^i)	#DIV/0!				Σ (Xi+1 / 2^i)	#DIV/0!				Σ (Xi+1 / 2^i)	#DIV/0!
		Φ	#DIV/0!				Φ	#DIV/0!				Φ	#DIV/0!				Φ	#DIV/0!				Φ	#DIV/0!				Φ	#DIV/0!				Φ	#DIV/0!				Φ	#DIV/0!				Φ	#DIV/0!				Φ	#DIV/0!
For D Divisions	Φ1	Copy Data			For D Divisions	Φ2				For D Divisions	Φ3				For D Divisions	Φ4				For D Divisions	Φ5				For D Divisions	Φ6				For D Divisions	Φ7				For D Divisions	Φ8				For D Divisions	Φ9				For D Divisions	Φ10
i = 1 to D	D=	Viability =			i = 1 to D	D=	Viability =			i = 1 to D	D=	Viability =			i = 1 to D	D=	Viability =			i = 1 to D	D=	Viability =			i = 1 to D	D=	Viability =			i = 1 to D	D=	Viability =			i = 1 to D	D=	Viability =			i = 1 to D	D=	Viability =			i = 1 to D	D=	Viability =
i	Xi	Xi Value	Xi+1 / 2^i	Xi''	i	Xi	Xi Value	Xi+1 / 2^i	Xi''	i	Xi	Xi Value	Xi+1 / 2^i	Xi''	i	Xi	Xi Value	Xi+1 / 2^i	Xi''	i	Xi	Xi Value	Xi+1 / 2^i	Xi''	i	Xi	Xi Value	Xi+1 / 2^i	Xi''	i	Xi	Xi Value	Xi+1 / 2^i	Xi''	i	Xi	Xi Value	Xi+1 / 2^i	Xi''	i	Xi	Xi Value	Xi+1 / 2^i	Xi''	i	Xi	Xi Value	Xi+1 / 2^i	Xi''
1	X1		0	#DIV/0!	1	X1	#DIV/0!	#DIV/0!	#DIV/0!	1	X1	#DIV/0!	#DIV/0!	#DIV/0!	1	X1	#DIV/0!	#DIV/0!	#DIV/0!	1	X1	#DIV/0!	#DIV/0!	#DIV/0!	1	X1	#DIV/0!	#DIV/0!	#DIV/0!	1	X1	#DIV/0!	#DIV/0!	#DIV/0!	1	X1	#DIV/0!	#DIV/0!	#DIV/0!	1	X1	#DIV/0!	#DIV/0!	#DIV/0!	1	X1	#DIV/0!	#DIV/0!	#DIV/0!
2	X2		0	#DIV/0!	2	X2	#DIV/0!	#DIV/0!	#DIV/0!	2	X2	#DIV/0!	#DIV/0!	#DIV/0!	2	X2	#DIV/0!	#DIV/0!	#DIV/0!	2	X2	#DIV/0!	#DIV/0!	#DIV/0!	2	X2	#DIV/0!	#DIV/0!	#DIV/0!	2	X2	#DIV/0!	#DIV/0!	#DIV/0!	2	X2	#DIV/0!	#DIV/0!	#DIV/0!	2	X2	#DIV/0!	#DIV/0!	#DIV/0!	2	X2	#DIV/0!	#DIV/0!	#DIV/0!
3	X3		0	#DIV/0!	3	X3	#DIV/0!	#DIV/0!	#DIV/0!	3	X3	#DIV/0!	#DIV/0!	#DIV/0!	3	X3	#DIV/0!	#DIV/0!	#DIV/0!	3	X3	#DIV/0!	#DIV/0!	#DIV/0!	3	X3	#DIV/0!	#DIV/0!	#DIV/0!	3	X3	#DIV/0!	#DIV/0!	#DIV/0!	3	X3	#DIV/0!	#DIV/0!	#DIV/0!	3	X3	#DIV/0!	#DIV/0!	#DIV/0!	3	X3	#DIV/0!	#DIV/0!	#DIV/0!
4	X4		0	#DIV/0!	4	X4	#DIV/0!	#DIV/0!	#DIV/0!	4	X4	#DIV/0!	#DIV/0!	#DIV/0!	4	X4	#DIV/0!	#DIV/0!	#DIV/0!	4	X4	#DIV/0!	#DIV/0!	#DIV/0!	4	X4	#DIV/0!	#DIV/0!	#DIV/0!	4	X4	#DIV/0!	#DIV/0!	#DIV/0!	4	X4	#DIV/0!	#DIV/0!	#DIV/0!	4	X4	#DIV/0!	#DIV/0!	#DIV/0!	4	X4	#DIV/0!	#DIV/0!	#DIV/0!
5	X5		0	#DIV/0!	5	X5	#DIV/0!	#DIV/0!	#DIV/0!	5	X5	#DIV/0!	#DIV/0!	#DIV/0!	5	X5	#DIV/0!	#DIV/0!	#DIV/0!	5	X5	#DIV/0!	#DIV/0!	#DIV/0!	5	X5	#DIV/0!	#DIV/0!	#DIV/0!	5	X5	#DIV/0!	#DIV/0!	#DIV/0!	5	X5	#DIV/0!	#DIV/0!	#DIV/0!	5	X5	#DIV/0!	#DIV/0!	#DIV/0!	5	X5	#DIV/0!	#DIV/0!	#DIV/0!
6	X6		0	#DIV/0!	6	X6	#DIV/0!	#DIV/0!	#DIV/0!	6	X6	#DIV/0!	#DIV/0!	#DIV/0!	6	X6	#DIV/0!	#DIV/0!	#DIV/0!	6	X6	#DIV/0!	#DIV/0!	#DIV/0!	6	X6	#DIV/0!	#DIV/0!	#DIV/0!	6	X6	#DIV/0!	#DIV/0!	#DIV/0!	6	X6	#DIV/0!	#DIV/0!	#DIV/0!	6	X6	#DIV/0!	#DIV/0!	#DIV/0!	6	X6	#DIV/0!	#DIV/0!	#DIV/0!
7	X7		0	#DIV/0!	7	X7	#DIV/0!	#DIV/0!	#DIV/0!	7	X7	#DIV/0!	#DIV/0!	#DIV/0!	7	X7	#DIV/0!	#DIV/0!	#DIV/0!	7	X7	#DIV/0!	#DIV/0!	#DIV/0!	7	X7	#DIV/0!	#DIV/0!	#DIV/0!	7	X7	#DIV/0!	#DIV/0!	#DIV/0!	7	X7	#DIV/0!	#DIV/0!	#DIV/0!	7	X7	#DIV/0!	#DIV/0!	#DIV/0!	7	X7	#DIV/0!	#DIV/0!	#DIV/0!
8	X8		0	#DIV/0!	8	X8	#DIV/0!	#DIV/0!	#DIV/0!	8	X8	#DIV/0!	#DIV/0!	#DIV/0!	8	X8	#DIV/0!	#DIV/0!	#DIV/0!	8	X8	#DIV/0!	#DIV/0!	#DIV/0!	8	X8	#DIV/0!	#DIV/0!	#DIV/0!	8	X8	#DIV/0!	#DIV/0!	#DIV/0!	8	X8	#DIV/0!	#DIV/0!	#DIV/0!	8	X8	#DIV/0!	#DIV/0!	#DIV/0!	8	X8	#DIV/0!	#DIV/0!	#DIV/0!
9	X9		0	#DIV/0!	9	X9	#DIV/0!	#DIV/0!	#DIV/0!	9	X9	#DIV/0!	#DIV/0!	#DIV/0!	9	X9	#DIV/0!	#DIV/0!	#DIV/0!	9	X9	#DIV/0!	#DIV/0!	#DIV/0!	9	X9	#DIV/0!	#DIV/0!	#DIV/0!	9	X9	#DIV/0!	#DIV/0!	#DIV/0!	9	X9	#DIV/0!	#DIV/0!	#DIV/0!	9	X9	#DIV/0!	#DIV/0!	#DIV/0!	9	X9	#DIV/0!	#DIV/0!	#DIV/0!
10	X10		0	#DIV/0!	10	X10	#DIV/0!	#DIV/0!	#DIV/0!	10	X10	#DIV/0!	#DIV/0!	#DIV/0!	10	X10	#DIV/0!	#DIV/0!	#DIV/0!	10	X10	#DIV/0!	#DIV/0!	#DIV/0!	10	X10	#DIV/0!	#DIV/0!	#DIV/0!	10	X10	#DIV/0!	#DIV/0!	#DIV/0!	10	X10	#DIV/0!	#DIV/0!	#DIV/0!	10	X10	#DIV/0!	#DIV/0!	#DIV/0!	10	X10	#DIV/0!	#DIV/0!	#DIV/0!
11	X11		0	#DIV/0!	11	X11	#DIV/0!	#DIV/0!	#DIV/0!	11	X11	#DIV/0!	#DIV/0!	#DIV/0!	11	X11	#DIV/0!	#DIV/0!	#DIV/0!	11	X11	#DIV/0!	#DIV/0!	#DIV/0!	11	X11	#DIV/0!	#DIV/0!	#DIV/0!	11	X11	#DIV/0!	#DIV/0!	#DIV/0!	11	X11	#DIV/0!	#DIV/0!	#DIV/0!	11	X11	#DIV/0!	#DIV/0!	#DIV/0!	11	X11	#DIV/0!	#DIV/0!	#DIV/0!
12	X12		0	#DIV/0!	12	X12	#DIV/0!	0	#DIV/0!	12	X12	#DIV/0!	0	#DIV/0!	12	X12	#DIV/0!	0	#DIV/0!	12	X12	#DIV/0!	0	#DIV/0!	12	X12	#DIV/0!	0	#DIV/0!	12	X12	#DIV/0!	0	#DIV/0!	12	X12	#DIV/0!	0	#DIV/0!	12	X12	#DIV/0!	0	#DIV/0!	12	X12	#DIV/0!	0	#DIV/0!
D	XD	0	0	#DIV/0!	D	XD	#DIV/0!	#DIV/0!	#DIV/0!	D	XD	#DIV/0!	#DIV/0!	#DIV/0!	D	XD	#DIV/0!	#DIV/0!	#DIV/0!	D	XD	#DIV/0!	#DIV/0!	#DIV/0!	D	XD	#DIV/0!	#DIV/0!	#DIV/0!	D	XD	#DIV/0!	#DIV/0!	#DIV/0!	D	XD	#DIV/0!	#DIV/0!	#DIV/0!	D	XD	#DIV/0!	#DIV/0!	#DIV/0!	D	XD	#DIV/0!	#DIV/0!	#DIV/0!
		Σ (Xi+1 / 2^i)	0				Σ (Xi+1 / 2^i)	#DIV/0!				Σ (Xi+1 / 2^i)	#DIV/0!				Σ (Xi+1 / 2^i)	#DIV/0!				Σ (Xi+1 / 2^i)	#DIV/0!				Σ (Xi+1 / 2^i)	#DIV/0!				Σ (Xi+1 / 2^i)	#DIV/0!				Σ (Xi+1 / 2^i)	#DIV/0!				Σ (Xi+1 / 2^i)	#DIV/0!				Σ (Xi+1 / 2^i)	#DIV/0!
		Φ	#DIV/0!				Φ	#DIV/0!				Φ	#DIV/0!				Φ	#DIV/0!				Φ	#DIV/0!				Φ	#DIV/0!				Φ	#DIV/0!				Φ	#DIV/0!				Φ	#DIV/0!				Φ	#DIV/0!
For D Divisions	Φ1	Copy Data			For D Divisions	Φ2				For D Divisions	Φ3				For D Divisions	Φ4				For D Divisions	Φ5				For D Divisions	Φ6				For D Divisions	Φ7				For D Divisions	Φ8				For D Divisions	Φ9				For D Divisions	Φ10
i = 1 to D	D=	Viability =			i = 1 to D	D=	Viability =			i = 1 to D	D=	Viability =			i = 1 to D	D=	Viability =			i = 1 to D	D=	Viability =			i = 1 to D	D=	Viability =			i = 1 to D	D=	Viability =			i = 1 to D	D=	Viability =			i = 1 to D	D=	Viability =			i = 1 to D	D=	Viability =
i	Xi	Xi Value	Xi+1 / 2^i	Xi''	i	Xi	Xi Value	Xi+1 / 2^i	Xi''	i	Xi	Xi Value	Xi+1 / 2^i	Xi''	i	Xi	Xi Value	Xi+1 / 2^i	Xi''	i	Xi	Xi Value	Xi+1 / 2^i	Xi''	i	Xi	Xi Value	Xi+1 / 2^i	Xi''	i	Xi	Xi Value	Xi+1 / 2^i	Xi''	i	Xi	Xi Value	Xi+1 / 2^i	Xi''	i	Xi	Xi Value	Xi+1 / 2^i	Xi''	i	Xi	Xi Value	Xi+1 / 2^i	Xi''
1	X1		0	#DIV/0!	1	X1	#DIV/0!	#DIV/0!	#DIV/0!	1	X1	#DIV/0!	#DIV/0!	#DIV/0!	1	X1	#DIV/0!	#DIV/0!	#DIV/0!	1	X1	#DIV/0!	#DIV/0!	#DIV/0!	1	X1	#DIV/0!	#DIV/0!	#DIV/0!	1	X1	#DIV/0!	#DIV/0!	#DIV/0!	1	X1	#DIV/0!	#DIV/0!	#DIV/0!	1	X1	#DIV/0!	#DIV/0!	#DIV/0!	1	X1	#DIV/0!	#DIV/0!	#DIV/0!
2	X2		0	#DIV/0!	2	X2	#DIV/0!	#DIV/0!	#DIV/0!	2	X2	#DIV/0!	#DIV/0!	#DIV/0!	2	X2	#DIV/0!	#DIV/0!	#DIV/0!	2	X2	#DIV/0!	#DIV/0!	#DIV/0!	2	X2	#DIV/0!	#DIV/0!	#DIV/0!	2	X2	#DIV/0!	#DIV/0!	#DIV/0!	2	X2	#DIV/0!	#DIV/0!	#DIV/0!	2	X2	#DIV/0!	#DIV/0!	#DIV/0!	2	X2	#DIV/0!	#DIV/0!	#DIV/0!
3	X3		0	#DIV/0!	3	X3	#DIV/0!	#DIV/0!	#DIV/0!	3	X3	#DIV/0!	#DIV/0!	#DIV/0!	3	X3	#DIV/0!	#DIV/0!	#DIV/0!	3	X3	#DIV/0!	#DIV/0!	#DIV/0!	3	X3	#DIV/0!	#DIV/0!	#DIV/0!	3	X3	#DIV/0!	#DIV/0!	#DIV/0!	3	X3	#DIV/0!	#DIV/0!	#DIV/0!	3	X3	#DIV/0!	#DIV/0!	#DIV/0!	3	X3	#DIV/0!	#DIV/0!	#DIV/0!
4	X4		0	#DIV/0!	4	X4	#DIV/0!	#DIV/0!	#DIV/0!	4	X4	#DIV/0!	#DIV/0!	#DIV/0!	4	X4	#DIV/0!	#DIV/0!	#DIV/0!	4	X4	#DIV/0!	#DIV/0!	#DIV/0!	4	X4	#DIV/0!	#DIV/0!	#DIV/0!	4	X4	#DIV/0!	#DIV/0!	#DIV/0!	4	X4	#DIV/0!	#DIV/0!	#DIV/0!	4	X4	#DIV/0!	#DIV/0!	#DIV/0!	4	X4	#DIV/0!	#DIV/0!	#DIV/0!
5	X5		0	#DIV/0!	5	X5	#DIV/0!	#DIV/0!	#DIV/0!	5	X5	#DIV/0!	#DIV/0!	#DIV/0!	5	X5	#DIV/0!	#DIV/0!	#DIV/0!	5	X5	#DIV/0!	#DIV/0!	#DIV/0!	5	X5	#DIV/0!	#DIV/0!	#DIV/0!	5	X5	#DIV/0!	#DIV/0!	#DIV/0!	5	X5	#DIV/0!	#DIV/0!	#DIV/0!	5	X5	#DIV/0!	#DIV/0!	#DIV/0!	5	X5	#DIV/0!	#DIV/0!	#DIV/0!
6	X6		0	#DIV/0!	6	X6	#DIV/0!	#DIV/0!	#DIV/0!	6	X6	#DIV/0!	#DIV/0!	#DIV/0!	6	X6	#DIV/0!	#DIV/0!	#DIV/0!	6	X6	#DIV/0!	#DIV/0!	#DIV/0!	6	X6	#DIV/0!	#DIV/0!	#DIV/0!	6	X6	#DIV/0!	#DIV/0!	#DIV/0!	6	X6	#DIV/0!	#DIV/0!	#DIV/0!	6	X6	#DIV/0!	#DIV/0!	#DIV/0!	6	X6	#DIV/0!	#DIV/0!	#DIV/0!
7	X7		0	#DIV/0!	7	X7	#DIV/0!	#DIV/0!	#DIV/0!	7	X7	#DIV/0!	#DIV/0!	#DIV/0!	7	X7	#DIV/0!	#DIV/0!	#DIV/0!	7	X7	#DIV/0!	#DIV/0!	#DIV/0!	7	X7	#DIV/0!	#DIV/0!	#DIV/0!	7	X7	#DIV/0!	#DIV/0!	#DIV/0!	7	X7	#DIV/0!	#DIV/0!	#DIV/0!	7	X7	#DIV/0!	#DIV/0!	#DIV/0!	7	X7	#DIV/0!	#DIV/0!	#DIV/0!
8	X8		0	#DIV/0!	8	X8	#DIV/0!	#DIV/0!	#DIV/0!	8	X8	#DIV/0!	#DIV/0!	#DIV/0!	8	X8	#DIV/0!	#DIV/0!	#DIV/0!	8	X8	#DIV/0!	#DIV/0!	#DIV/0!	8	X8	#DIV/0!	#DIV/0!	#DIV/0!	8	X8	#DIV/0!	#DIV/0!	#DIV/0!	8	X8	#DIV/0!	#DIV/0!	#DIV/0!	8	X8	#DIV/0!	#DIV/0!	#DIV/0!	8	X8	#DIV/0!	#DIV/0!	#DIV/0!
9	X9		0	#DIV/0!	9	X9	#DIV/0!	#DIV/0!	#DIV/0!	9	X9	#DIV/0!	#DIV/0!	#DIV/0!	9	X9	#DIV/0!	#DIV/0!	#DIV/0!	9	X9	#DIV/0!	#DIV/0!	#DIV/0!	9	X9	#DIV/0!	#DIV/0!	#DIV/0!	9	X9	#DIV/0!	#DIV/0!	#DIV/0!	9	X9	#DIV/0!	#DIV/0!	#DIV/0!	9	X9	#DIV/0!	#DIV/0!	#DIV/0!	9	X9	#DIV/0!	#DIV/0!	#DIV/0!
10	X10		0	#DIV/0!	10	X10	#DIV/0!	#DIV/0!	#DIV/0!	10	X10	#DIV/0!	#DIV/0!	#DIV/0!	10	X10	#DIV/0!	#DIV/0!	#DIV/0!	10	X10	#DIV/0!	#DIV/0!	#DIV/0!	10	X10	#DIV/0!	#DIV/0!	#DIV/0!	10	X10	#DIV/0!	#DIV/0!	#DIV/0!	10	X10	#DIV/0!	#DIV/0!	#DIV/0!	10	X10	#DIV/0!	#DIV/0!	#DIV/0!	10	X10	#DIV/0!	#DIV/0!	#DIV/0!
11	X11		0	#DIV/0!	11	X11	#DIV/0!	#DIV/0!	#DIV/0!	11	X11	#DIV/0!	#DIV/0!	#DIV/0!	11	X11	#DIV/0!	#DIV/0!	#DIV/0!	11	X11	#DIV/0!	#DIV/0!	#DIV/0!	11	X11	#DIV/0!	#DIV/0!	#DIV/0!	11	X11	#DIV/0!	#DIV/0!	#DIV/0!	11	X11	#DIV/0!	#DIV/0!	#DIV/0!	11	X11	#DIV/0!	#DIV/0!	#DIV/0!	11	X11	#DIV/0!	#DIV/0!	#DIV/0!
12	X12		0	#DIV/0!	12	X12	#DIV/0!	0	#DIV/0!	12	X12	#DIV/0!	0	#DIV/0!	12	X12	#DIV/0!	0	#DIV/0!	12	X12	#DIV/0!	0	#DIV/0!	12	X12	#DIV/0!	0	#DIV/0!	12	X12	#DIV/0!	0	#DIV/0!	12	X12	#DIV/0!	0	#DIV/0!	12	X12	#DIV/0!	0	#DIV/0!	12	X12	#DIV/0!	0	#DIV/0!
D	XD	0	0	#DIV/0!	D	XD	#DIV/0!	#DIV/0!	#DIV/0!	D	XD	#DIV/0!	#DIV/0!	#DIV/0!	D	XD	#DIV/0!	#DIV/0!	#DIV/0!	D	XD	#DIV/0!	#DIV/0!	#DIV/0!	D	XD	#DIV/0!	#DIV/0!	#DIV/0!	D	XD	#DIV/0!	#DIV/0!	#DIV/0!	D	XD	#DIV/0!	#DIV/0!	#DIV/0!	D	XD	#DIV/0!	#DIV/0!	#DIV/0!	D	XD	#DIV/0!	#DIV/0!	#DIV/0!
		Σ (Xi+1 / 2^i)	0				Σ (Xi+1 / 2^i)	#DIV/0!				Σ (Xi+1 / 2^i)	#DIV/0!				Σ (Xi+1 / 2^i)	#DIV/0!				Σ (Xi+1 / 2^i)	#DIV/0!				Σ (Xi+1 / 2^i)	#DIV/0!				Σ (Xi+1 / 2^i)	#DIV/0!				Σ (Xi+1 / 2^i)	#DIV/0!				Σ (Xi+1 / 2^i)	#DIV/0!				Σ (Xi+1 / 2^i)	#DIV/0!
		Φ	#DIV/0!				Φ	#DIV/0!				Φ	#DIV/0!				Φ	#DIV/0!				Φ	#DIV/0!				Φ	#DIV/0!				Φ	#DIV/0!				Φ	#DIV/0!				Φ	#DIV/0!				Φ	#DIV/0!
For D Divisions	Φ1	Copy Data			For D Divisions	Φ2				For D Divisions	Φ3				For D Divisions	Φ4				For D Divisions	Φ5				For D Divisions	Φ6				For D Divisions	Φ7				For D Divisions	Φ8				For D Divisions	Φ9				For D Divisions	Φ10
i = 1 to D	D=	Viability =			i = 1 to D	D=	Viability =			i = 1 to D	D=	Viability =			i = 1 to D	D=	Viability =			i = 1 to D	D=	Viability =			i = 1 to D	D=	Viability =			i = 1 to D	D=	Viability =			i = 1 to D	D=	Viability =			i = 1 to D	D=	Viability =			i = 1 to D	D=	Viability =
i	Xi	Xi Value	Xi+1 / 2^i	Xi''	i	Xi	Xi Value	Xi+1 / 2^i	Xi''	i	Xi	Xi Value	Xi+1 / 2^i	Xi''	i	Xi	Xi Value	Xi+1 / 2^i	Xi''	i	Xi	Xi Value	Xi+1 / 2^i	Xi''	i	Xi	Xi Value	Xi+1 / 2^i	Xi''	i	Xi	Xi Value	Xi+1 / 2^i	Xi''	i	Xi	Xi Value	Xi+1 / 2^i	Xi''	i	Xi	Xi Value	Xi+1 / 2^i	Xi''	i	Xi	Xi Value	Xi+1 / 2^i	Xi''
1	X1		0	#DIV/0!	1	X1	#DIV/0!	#DIV/0!	#DIV/0!	1	X1	#DIV/0!	#DIV/0!	#DIV/0!	1	X1	#DIV/0!	#DIV/0!	#DIV/0!	1	X1	#DIV/0!	#DIV/0!	#DIV/0!	1	X1	#DIV/0!	#DIV/0!	#DIV/0!	1	X1	#DIV/0!	#DIV/0!	#DIV/0!	1	X1	#DIV/0!	#DIV/0!	#DIV/0!	1	X1	#DIV/0!	#DIV/0!	#DIV/0!	1	X1	#DIV/0!	#DIV/0!	#DIV/0!
2	X2		0	#DIV/0!	2	X2	#DIV/0!	#DIV/0!	#DIV/0!	2	X2	#DIV/0!	#DIV/0!	#DIV/0!	2	X2	#DIV/0!	#DIV/0!	#DIV/0!	2	X2	#DIV/0!	#DIV/0!	#DIV/0!	2	X2	#DIV/0!	#DIV/0!	#DIV/0!	2	X2	#DIV/0!	#DIV/0!	#DIV/0!	2	X2	#DIV/0!	#DIV/0!	#DIV/0!	2	X2	#DIV/0!	#DIV/0!	#DIV/0!	2	X2	#DIV/0!	#DIV/0!	#DIV/0!
3	X3		0	#DIV/0!	3	X3	#DIV/0!	#DIV/0!	#DIV/0!	3	X3	#DIV/0!	#DIV/0!	#DIV/0!	3	X3	#DIV/0!	#DIV/0!	#DIV/0!	3	X3	#DIV/0!	#DIV/0!	#DIV/0!	3	X3	#DIV/0!	#DIV/0!	#DIV/0!	3	X3	#DIV/0!	#DIV/0!	#DIV/0!	3	X3	#DIV/0!	#DIV/0!	#DIV/0!	3	X3	#DIV/0!	#DIV/0!	#DIV/0!	3	X3	#DIV/0!	#DIV/0!	#DIV/0!
4	X4		0	#DIV/0!	4	X4	#DIV/0!	#DIV/0!	#DIV/0!	4	X4	#DIV/0!	#DIV/0!	#DIV/0!	4	X4	#DIV/0!	#DIV/0!	#DIV/0!	4	X4	#DIV/0!	#DIV/0!	#DIV/0!	4	X4	#DIV/0!	#DIV/0!	#DIV/0!	4	X4	#DIV/0!	#DIV/0!	#DIV/0!	4	X4	#DIV/0!	#DIV/0!	#DIV/0!	4	X4	#DIV/0!	#DIV/0!	#DIV/0!	4	X4	#DIV/0!	#DIV/0!	#DIV/0!
5	X5		0	#DIV/0!	5	X5	#DIV/0!	#DIV/0!	#DIV/0!	5	X5	#DIV/0!	#DIV/0!	#DIV/0!	5	X5	#DIV/0!	#DIV/0!	#DIV/0!	5	X5	#DIV/0!	#DIV/0!	#DIV/0!	5	X5	#DIV/0!	#DIV/0!	#DIV/0!	5	X5	#DIV/0!	#DIV/0!	#DIV/0!	5	X5	#DIV/0!	#DIV/0!	#DIV/0!	5	X5	#DIV/0!	#DIV/0!	#DIV/0!	5	X5	#DIV/0!	#DIV/0!	#DIV/0!
6	X6		0	#DIV/0!	6	X6	#DIV/0!	#DIV/0!	#DIV/0!	6	X6	#DIV/0!	#DIV/0!	#DIV/0!	6	X6	#DIV/0!	#DIV/0!	#DIV/0!	6	X6	#DIV/0!	#DIV/0!	#DIV/0!	6	X6	#DIV/0!	#DIV/0!	#DIV/0!	6	X6	#DIV/0!	#DIV/0!	#DIV/0!	6	X6	#DIV/0!	#DIV/0!	#DIV/0!	6	X6	#DIV/0!	#DIV/0!	#DIV/0!	6	X6	#DIV/0!	#DIV/0!	#DIV/0!
7	X7		0	#DIV/0!	7	X7	#DIV/0!	#DIV/0!	#DIV/0!	7	X7	#DIV/0!	#DIV/0!	#DIV/0!	7	X7	#DIV/0!	#DIV/0!	#DIV/0!	7	X7	#DIV/0!	#DIV/0!	#DIV/0!	7	X7	#DIV/0!	#DIV/0!	#DIV/0!	7	X7	#DIV/0!	#DIV/0!	#DIV/0!	7	X7	#DIV/0!	#DIV/0!	#DIV/0!	7	X7	#DIV/0!	#DIV/0!	#DIV/0!	7	X7	#DIV/0!	#DIV/0!	#DIV/0!
8	X8		0	#DIV/0!	8	X8	#DIV/0!	#DIV/0!	#DIV/0!	8	X8	#DIV/0!	#DIV/0!	#DIV/0!	8	X8	#DIV/0!	#DIV/0!	#DIV/0!	8	X8	#DIV/0!	#DIV/0!	#DIV/0!	8	X8	#DIV/0!	#DIV/0!	#DIV/0!	8	X8	#DIV/0!	#DIV/0!	#DIV/0!	8	X8	#DIV/0!	#DIV/0!	#DIV/0!	8	X8	#DIV/0!	#DIV/0!	#DIV/0!	8	X8	#DIV/0!	#DIV/0!	#DIV/0!
9	X9		0	#DIV/0!	9	X9	#DIV/0!	#DIV/0!	#DIV/0!	9	X9	#DIV/0!	#DIV/0!	#DIV/0!	9	X9	#DIV/0!	#DIV/0!	#DIV/0!	9	X9	#DIV/0!	#DIV/0!	#DIV/0!	9	X9	#DIV/0!	#DIV/0!	#DIV/0!	9	X9	#DIV/0!	#DIV/0!	#DIV/0!	9	X9	#DIV/0!	#DIV/0!	#DIV/0!	9	X9	#DIV/0!	#DIV/0!	#DIV/0!	9	X9	#DIV/0!	#DIV/0!	#DIV/0!
10	X10		0	#DIV/0!	10	X10	#DIV/0!	#DIV/0!	#DIV/0!	10	X10	#DIV/0!	#DIV/0!	#DIV/0!	10	X10	#DIV/0!	#DIV/0!	#DIV/0!	10	X10	#DIV/0!	#DIV/0!	#DIV/0!	10	X10	#DIV/0!	#DIV/0!	#DIV/0!	10	X10	#DIV/0!	#DIV/0!	#DIV/0!	10	X10	#DIV/0!	#DIV/0!	#DIV/0!	10	X10	#DIV/0!	#DIV/0!	#DIV/0!	10	X10	#DIV/0!	#DIV/0!	#DIV/0!
11	X11		0	#DIV/0!	11	X11	#DIV/0!	#DIV/0!	#DIV/0!	11	X11	#DIV/0!	#DIV/0!	#DIV/0!	11	X11	#DIV/0!	#DIV/0!	#DIV/0!	11	X11	#DIV/0!	#DIV/0!	#DIV/0!	11	X11	#DIV/0!	#DIV/0!	#DIV/0!	11	X11	#DIV/0!	#DIV/0!	#DIV/0!	11	X11	#DIV/0!	#DIV/0!	#DIV/0!	11	X11	#DIV/0!	#DIV/0!	#DIV/0!	11	X11	#DIV/0!	#DIV/0!	#DIV/0!
12	X12		0	#DIV/0!	12	X12	#DIV/0!	0	#DIV/0!	12	X12	#DIV/0!	0	#DIV/0!	12	X12	#DIV/0!	0	#DIV/0!	12	X12	#DIV/0!	0	#DIV/0!	12	X12	#DIV/0!	0	#DIV/0!	12	X12	#DIV/0!	0	#DIV/0!	12	X12	#DIV/0!	0	#DIV/0!	12	X12	#DIV/0!	0	#DIV/0!	12	X12	#DIV/0!	0	#DIV/0!
D	XD	0	0	#DIV/0!	D	XD	#DIV/0!	#DIV/0!	#DIV/0!	D	XD	#DIV/0!	#DIV/0!	#DIV/0!	D	XD	#DIV/0!	#DIV/0!	#DIV/0!	D	XD	#DIV/0!	#DIV/0!	#DIV/0!	D	XD	#DIV/0!	#DIV/0!	#DIV/0!	D	XD	#DIV/0!	#DIV/0!	#DIV/0!	D	XD	#DIV/0!	#DIV/0!	#DIV/0!	D	XD	#DIV/0!	#DIV/0!	#DIV/0!	D	XD	#DIV/0!	#DIV/0!	#DIV/0!
		Σ (Xi+1 / 2^i)	0				Σ (Xi+1 / 2^i)	#DIV/0!				Σ (Xi+1 / 2^i)	#DIV/0!				Σ (Xi+1 / 2^i)	#DIV/0!				Σ (Xi+1 / 2^i)	#DIV/0!				Σ (Xi+1 / 2^i)	#DIV/0!				Σ (Xi+1 / 2^i)	#DIV/0!				Σ (Xi+1 / 2^i)	#DIV/0!				Σ (Xi+1 / 2^i)	#DIV/0!				Σ (Xi+1 / 2^i)	#DIV/0!
		Φ	#DIV/0!				Φ	#DIV/0!				Φ	#DIV/0!				Φ	#DIV/0!				Φ	#DIV/0!				Φ	#DIV/0!				Φ	#DIV/0!				Φ	#DIV/0!				Φ	#DIV/0!				Φ	#DIV/0!
For D Divisions	Φ1	Copy Data			For D Divisions	Φ2				For D Divisions	Φ3				For D Divisions	Φ4				For D Divisions	Φ5				For D Divisions	Φ6				For D Divisions	Φ7				For D Divisions	Φ8				For D Divisions	Φ9				For D Divisions	Φ10
i = 1 to D	D=	Viability =			i = 1 to D	D=	Viability =			i = 1 to D	D=	Viability =			i = 1 to D	D=	Viability =			i = 1 to D	D=	Viability =			i = 1 to D	D=	Viability =			i = 1 to D	D=	Viability =			i = 1 to D	D=	Viability =			i = 1 to D	D=	Viability =			i = 1 to D	D=	Viability =
i	Xi	Xi Value	Xi+1 / 2^i	Xi''	i	Xi	Xi Value	Xi+1 / 2^i	Xi''	i	Xi	Xi Value	Xi+1 / 2^i	Xi''	i	Xi	Xi Value	Xi+1 / 2^i	Xi''	i	Xi	Xi Value	Xi+1 / 2^i	Xi''	i	Xi	Xi Value	Xi+1 / 2^i	Xi''	i	Xi	Xi Value	Xi+1 / 2^i	Xi''	i	Xi	Xi Value	Xi+1 / 2^i	Xi''	i	Xi	Xi Value	Xi+1 / 2^i	Xi''	i	Xi	Xi Value	Xi+1 / 2^i	Xi''
1	X1		0	#DIV/0!	1	X1	#DIV/0!	#DIV/0!	#DIV/0!	1	X1	#DIV/0!	#DIV/0!	#DIV/0!	1	X1	#DIV/0!	#DIV/0!	#DIV/0!	1	X1	#DIV/0!	#DIV/0!	#DIV/0!	1	X1	#DIV/0!	#DIV/0!	#DIV/0!	1	X1	#DIV/0!	#DIV/0!	#DIV/0!	1	X1	#DIV/0!	#DIV/0!	#DIV/0!	1	X1	#DIV/0!	#DIV/0!	#DIV/0!	1	X1	#DIV/0!	#DIV/0!	#DIV/0!
2	X2		0	#DIV/0!	2	X2	#DIV/0!	#DIV/0!	#DIV/0!	2	X2	#DIV/0!	#DIV/0!	#DIV/0!	2	X2	#DIV/0!	#DIV/0!	#DIV/0!	2	X2	#DIV/0!	#DIV/0!	#DIV/0!	2	X2	#DIV/0!	#DIV/0!	#DIV/0!	2	X2	#DIV/0!	#DIV/0!	#DIV/0!	2	X2	#DIV/0!	#DIV/0!	#DIV/0!	2	X2	#DIV/0!	#DIV/0!	#DIV/0!	2	X2	#DIV/0!	#DIV/0!	#DIV/0!
3	X3		0	#DIV/0!	3	X3	#DIV/0!	#DIV/0!	#DIV/0!	3	X3	#DIV/0!	#DIV/0!	#DIV/0!	3	X3	#DIV/0!	#DIV/0!	#DIV/0!	3	X3	#DIV/0!	#DIV/0!	#DIV/0!	3	X3	#DIV/0!	#DIV/0!	#DIV/0!	3	X3	#DIV/0!	#DIV/0!	#DIV/0!	3	X3	#DIV/0!	#DIV/0!	#DIV/0!	3	X3	#DIV/0!	#DIV/0!	#DIV/0!	3	X3	#DIV/0!	#DIV/0!	#DIV/0!
4	X4		0	#DIV/0!	4	X4	#DIV/0!	#DIV/0!	#DIV/0!	4	X4	#DIV/0!	#DIV/0!	#DIV/0!	4	X4	#DIV/0!	#DIV/0!	#DIV/0!	4	X4	#DIV/0!	#DIV/0!	#DIV/0!	4	X4	#DIV/0!	#DIV/0!	#DIV/0!	4	X4	#DIV/0!	#DIV/0!	#DIV/0!	4	X4	#DIV/0!	#DIV/0!	#DIV/0!	4	X4	#DIV/0!	#DIV/0!	#DIV/0!	4	X4	#DIV/0!	#DIV/0!	#DIV/0!
5	X5		0	#DIV/0!	5	X5	#DIV/0!	#DIV/0!	#DIV/0!	5	X5	#DIV/0!	#DIV/0!	#DIV/0!	5	X5	#DIV/0!	#DIV/0!	#DIV/0!	5	X5	#DIV/0!	#DIV/0!	#DIV/0!	5	X5	#DIV/0!	#DIV/0!	#DIV/0!	5	X5	#DIV/0!	#DIV/0!	#DIV/0!	5	X5	#DIV/0!	#DIV/0!	#DIV/0!	5	X5	#DIV/0!	#DIV/0!	#DIV/0!	5	X5	#DIV/0!	#DIV/0!	#DIV/0!
6	X6		0	#DIV/0!	6	X6	#DIV/0!	#DIV/0!	#DIV/0!	6	X6	#DIV/0!	#DIV/0!	#DIV/0!	6	X6	#DIV/0!	#DIV/0!	#DIV/0!	6	X6	#DIV/0!	#DIV/0!	#DIV/0!	6	X6	#DIV/0!	#DIV/0!	#DIV/0!	6	X6	#DIV/0!	#DIV/0!	#DIV/0!	6	X6	#DIV/0!	#DIV/0!	#DIV/0!	6	X6	#DIV/0!	#DIV/0!	#DIV/0!	6	X6	#DIV/0!	#DIV/0!	#DIV/0!
7	X7		0	#DIV/0!	7	X7	#DIV/0!	#DIV/0!	#DIV/0!	7	X7	#DIV/0!	#DIV/0!	#DIV/0!	7	X7	#DIV/0!	#DIV/0!	#DIV/0!	7	X7	#DIV/0!	#DIV/0!	#DIV/0!	7	X7	#DIV/0!	#DIV/0!	#DIV/0!	7	X7	#DIV/0!	#DIV/0!	#DIV/0!	7	X7	#DIV/0!	#DIV/0!	#DIV/0!	7	X7	#DIV/0!	#DIV/0!	#DIV/0!	7	X7	#DIV/0!	#DIV/0!	#DIV/0!
8	X8		0	#DIV/0!	8	X8	#DIV/0!	#DIV/0!	#DIV/0!	8	X8	#DIV/0!	#DIV/0!	#DIV/0!	8	X8	#DIV/0!	#DIV/0!	#DIV/0!	8	X8	#DIV/0!	#DIV/0!	#DIV/0!	8	X8	#DIV/0!	#DIV/0!	#DIV/0!	8	X8	#DIV/0!	#DIV/0!	#DIV/0!	8	X8	#DIV/0!	#DIV/0!	#DIV/0!	8	X8	#DIV/0!	#DIV/0!	#DIV/0!	8	X8	#DIV/0!	#DIV/0!	#DIV/0!
9	X9		0	#DIV/0!	9	X9	#DIV/0!	#DIV/0!	#DIV/0!	9	X9	#DIV/0!	#DIV/0!	#DIV/0!	9	X9	#DIV/0!	#DIV/0!	#DIV/0!	9	X9	#DIV/0!	#DIV/0!	#DIV/0!	9	X9	#DIV/0!	#DIV/0!	#DIV/0!	9	X9	#DIV/0!	#DIV/0!	#DIV/0!	9	X9	#DIV/0!	#DIV/0!	#DIV/0!	9	X9	#DIV/0!	#DIV/0!	#DIV/0!	9	X9	#DIV/0!	#DIV/0!	#DIV/0!
10	X10		0	#DIV/0!	10	X10	#DIV/0!	#DIV/0!	#DIV/0!	10	X10	#DIV/0!	#DIV/0!	#DIV/0!	10	X10	#DIV/0!	#DIV/0!	#DIV/0!	10	X10	#DIV/0!	#DIV/0!	#DIV/0!	10	X10	#DIV/0!	#DIV/0!	#DIV/0!	10	X10	#DIV/0!	#DIV/0!	#DIV/0!	10	X10	#DIV/0!	#DIV/0!	#DIV/0!	10	X10	#DIV/0!	#DIV/0!	#DIV/0!	10	X10	#DIV/0!	#DIV/0!	#DIV/0!
11	X11		0	#DIV/0!	11	X11	#DIV/0!	#DIV/0!	#DIV/0!	11	X11	#DIV/0!	#DIV/0!	#DIV/0!	11	X11	#DIV/0!	#DIV/0!	#DIV/0!	11	X11	#DIV/0!	#DIV/0!	#DIV/0!	11	X11	#DIV/0!	#DIV/0!	#DIV/0!	11	X11	#DIV/0!	#DIV/0!	#DIV/0!	11	X11	#DIV/0!	#DIV/0!	#DIV/0!	11	X11	#DIV/0!	#DIV/0!	#DIV/0!	11	X11	#DIV/0!	#DIV/0!	#DIV/0!
12	X12		0	#DIV/0!	12	X12	#DIV/0!	0	#DIV/0!	12	X12	#DIV/0!	0	#DIV/0!	12	X12	#DIV/0!	0	#DIV/0!	12	X12	#DIV/0!	0	#DIV/0!	12	X12	#DIV/0!	0	#DIV/0!	12	X12	#DIV/0!	0	#DIV/0!	12	X12	#DIV/0!	0	#DIV/0!	12	X12	#DIV/0!	0	#DIV/0!	12	X12	#DIV/0!	0	#DIV/0!
D	XD	0	0	#DIV/0!	D	XD	#DIV/0!	#DIV/0!	#DIV/0!	D	XD	#DIV/0!	#DIV/0!	#DIV/0!	D	XD	#DIV/0!	#DIV/0!	#DIV/0!	D	XD	#DIV/0!	#DIV/0!	#DIV/0!	D	XD	#DIV/0!	#DIV/0!	#DIV/0!	D	XD	#DIV/0!	#DIV/0!	#DIV/0!	D	XD	#DIV/0!	#DIV/0!	#DIV/0!	D	XD	#DIV/0!	#DIV/0!	#DIV/0!	D	XD	#DIV/0!	#DIV/0!	#DIV/0!
		Σ (Xi+1 / 2^i)	0				Σ (Xi+1 / 2^i)	#DIV/0!				Σ (Xi+1 / 2^i)	#DIV/0!				Σ (Xi+1 / 2^i)	#DIV/0!				Σ (Xi+1 / 2^i)	#DIV/0!				Σ (Xi+1 / 2^i)	#DIV/0!				Σ (Xi+1 / 2^i)	#DIV/0!				Σ (Xi+1 / 2^i)	#DIV/0!				Σ (Xi+1 / 2^i)	#DIV/0!				Σ (Xi+1 / 2^i)	#DIV/0!
		Φ	#DIV/0!				Φ	#DIV/0!				Φ	#DIV/0!				Φ	#DIV/0!				Φ	#DIV/0!				Φ	#DIV/0!				Φ	#DIV/0!				Φ	#DIV/0!				Φ	#DIV/0!				Φ	#DIV/0!
For D Divisions	Φ1	Copy Data			For D Divisions	Φ2				For D Divisions	Φ3				For D Divisions	Φ4				For D Divisions	Φ5				For D Divisions	Φ6				For D Divisions	Φ7				For D Divisions	Φ8				For D Divisions	Φ9				For D Divisions	Φ10
i = 1 to D	D=	Viability =			i = 1 to D	D=	Viability =			i = 1 to D	D=	Viability =			i = 1 to D	D=	Viability =			i = 1 to D	D=	Viability =			i = 1 to D	D=	Viability =			i = 1 to D	D=	Viability =			i = 1 to D	D=	Viability =			i = 1 to D	D=	Viability =			i = 1 to D	D=	Viability =
i	Xi	Xi Value	Xi+1 / 2^i	Xi''	i	Xi	Xi Value	Xi+1 / 2^i	Xi''	i	Xi	Xi Value	Xi+1 / 2^i	Xi''	i	Xi	Xi Value	Xi+1 / 2^i	Xi''	i	Xi	Xi Value	Xi+1 / 2^i	Xi''	i	Xi	Xi Value	Xi+1 / 2^i	Xi''	i	Xi	Xi Value	Xi+1 / 2^i	Xi''	i	Xi	Xi Value	Xi+1 / 2^i	Xi''	i	Xi	Xi Value	Xi+1 / 2^i	Xi''	i	Xi	Xi Value	Xi+1 / 2^i	Xi''
1	X1		0	#DIV/0!	1	X1	#DIV/0!	#DIV/0!	#DIV/0!	1	X1	#DIV/0!	#DIV/0!	#DIV/0!	1	X1	#DIV/0!	#DIV/0!	#DIV/0!	1	X1	#DIV/0!	#DIV/0!	#DIV/0!	1	X1	#DIV/0!	#DIV/0!	#DIV/0!	1	X1	#DIV/0!	#DIV/0!	#DIV/0!	1	X1	#DIV/0!	#DIV/0!	#DIV/0!	1	X1	#DIV/0!	#DIV/0!	#DIV/0!	1	X1	#DIV/0!	#DIV/0!	#DIV/0!
2	X2		0	#DIV/0!	2	X2	#DIV/0!	#DIV/0!	#DIV/0!	2	X2	#DIV/0!	#DIV/0!	#DIV/0!	2	X2	#DIV/0!	#DIV/0!	#DIV/0!	2	X2	#DIV/0!	#DIV/0!	#DIV/0!	2	X2	#DIV/0!	#DIV/0!	#DIV/0!	2	X2	#DIV/0!	#DIV/0!	#DIV/0!	2	X2	#DIV/0!	#DIV/0!	#DIV/0!	2	X2	#DIV/0!	#DIV/0!	#DIV/0!	2	X2	#DIV/0!	#DIV/0!	#DIV/0!
3	X3		0	#DIV/0!	3	X3	#DIV/0!	#DIV/0!	#DIV/0!	3	X3	#DIV/0!	#DIV/0!	#DIV/0!	3	X3	#DIV/0!	#DIV/0!	#DIV/0!	3	X3	#DIV/0!	#DIV/0!	#DIV/0!	3	X3	#DIV/0!	#DIV/0!	#DIV/0!	3	X3	#DIV/0!	#DIV/0!	#DIV/0!	3	X3	#DIV/0!	#DIV/0!	#DIV/0!	3	X3	#DIV/0!	#DIV/0!	#DIV/0!	3	X3	#DIV/0!	#DIV/0!	#DIV/0!
4	X4		0	#DIV/0!	4	X4	#DIV/0!	#DIV/0!	#DIV/0!	4	X4	#DIV/0!	#DIV/0!	#DIV/0!	4	X4	#DIV/0!	#DIV/0!	#DIV/0!	4	X4	#DIV/0!	#DIV/0!	#DIV/0!	4	X4	#DIV/0!	#DIV/0!	#DIV/0!	4	X4	#DIV/0!	#DIV/0!	#DIV/0!	4	X4	#DIV/0!	#DIV/0!	#DIV/0!	4	X4	#DIV/0!	#DIV/0!	#DIV/0!	4	X4	#DIV/0!	#DIV/0!	#DIV/0!
5	X5		0	#DIV/0!	5	X5	#DIV/0!	#DIV/0!	#DIV/0!	5	X5	#DIV/0!	#DIV/0!	#DIV/0!	5	X5	#DIV/0!	#DIV/0!	#DIV/0!	5	X5	#DIV/0!	#DIV/0!	#DIV/0!	5	X5	#DIV/0!	#DIV/0!	#DIV/0!	5	X5	#DIV/0!	#DIV/0!	#DIV/0!	5	X5	#DIV/0!	#DIV/0!	#DIV/0!	5	X5	#DIV/0!	#DIV/0!	#DIV/0!	5	X5	#DIV/0!	#DIV/0!	#DIV/0!
6	X6		0	#DIV/0!	6	X6	#DIV/0!	#DIV/0!	#DIV/0!	6	X6	#DIV/0!	#DIV/0!	#DIV/0!	6	X6	#DIV/0!	#DIV/0!	#DIV/0!	6	X6	#DIV/0!	#DIV/0!	#DIV/0!	6	X6	#DIV/0!	#DIV/0!	#DIV/0!	6	X6	#DIV/0!	#DIV/0!	#DIV/0!	6	X6	#DIV/0!	#DIV/0!	#DIV/0!	6	X6	#DIV/0!	#DIV/0!	#DIV/0!	6	X6	#DIV/0!	#DIV/0!	#DIV/0!
7	X7		0	#DIV/0!	7	X7	#DIV/0!	#DIV/0!	#DIV/0!	7	X7	#DIV/0!	#DIV/0!	#DIV/0!	7	X7	#DIV/0!	#DIV/0!	#DIV/0!	7	X7	#DIV/0!	#DIV/0!	#DIV/0!	7	X7	#DIV/0!	#DIV/0!	#DIV/0!	7	X7	#DIV/0!	#DIV/0!	#DIV/0!	7	X7	#DIV/0!	#DIV/0!	#DIV/0!	7	X7	#DIV/0!	#DIV/0!	#DIV/0!	7	X7	#DIV/0!	#DIV/0!	#DIV/0!
8	X8		0	#DIV/0!	8	X8	#DIV/0!	#DIV/0!	#DIV/0!	8	X8	#DIV/0!	#DIV/0!	#DIV/0!	8	X8	#DIV/0!	#DIV/0!	#DIV/0!	8	X8	#DIV/0!	#DIV/0!	#DIV/0!	8	X8	#DIV/0!	#DIV/0!	#DIV/0!	8	X8	#DIV/0!	#DIV/0!	#DIV/0!	8	X8	#DIV/0!	#DIV/0!	#DIV/0!	8	X8	#DIV/0!	#DIV/0!	#DIV/0!	8	X8	#DIV/0!	#DIV/0!	#DIV/0!
9	X9		0	#DIV/0!	9	X9	#DIV/0!	#DIV/0!	#DIV/0!	9	X9	#DIV/0!	#DIV/0!	#DIV/0!	9	X9	#DIV/0!	#DIV/0!	#DIV/0!	9	X9	#DIV/0!	#DIV/0!	#DIV/0!	9	X9	#DIV/0!	#DIV/0!	#DIV/0!	9	X9	#DIV/0!	#DIV/0!	#DIV/0!	9	X9	#DIV/0!	#DIV/0!	#DIV/0!	9	X9	#DIV/0!	#DIV/0!	#DIV/0!	9	X9	#DIV/0!	#DIV/0!	#DIV/0!
10	X10		0	#DIV/0!	10	X10	#DIV/0!	#DIV/0!	#DIV/0!	10	X10	#DIV/0!	#DIV/0!	#DIV/0!	10	X10	#DIV/0!	#DIV/0!	#DIV/0!	10	X10	#DIV/0!	#DIV/0!	#DIV/0!	10	X10	#DIV/0!	#DIV/0!	#DIV/0!	10	X10	#DIV/0!	#DIV/0!	#DIV/0!	10	X10	#DIV/0!	#DIV/0!	#DIV/0!	10	X10	#DIV/0!	#DIV/0!	#DIV/0!	10	X10	#DIV/0!	#DIV/0!	#DIV/0!
11	X11		0	#DIV/0!	11	X11	#DIV/0!	#DIV/0!	#DIV/0!	11	X11	#DIV/0!	#DIV/0!	#DIV/0!	11	X11	#DIV/0!	#DIV/0!	#DIV/0!	11	X11	#DIV/0!	#DIV/0!	#DIV/0!	11	X11	#DIV/0!	#DIV/0!	#DIV/0!	11	X11	#DIV/0!	#DIV/0!	#DIV/0!	11	X11	#DIV/0!	#DIV/0!	#DIV/0!	11	X11	#DIV/0!	#DIV/0!	#DIV/0!	11	X11	#DIV/0!	#DIV/0!	#DIV/0!
12	X12		0	#DIV/0!	12	X12	#DIV/0!	0	#DIV/0!	12	X12	#DIV/0!	0	#DIV/0!	12	X12	#DIV/0!	0	#DIV/0!	12	X12	#DIV/0!	0	#DIV/0!	12	X12	#DIV/0!	0	#DIV/0!	12	X12	#DIV/0!	0	#DIV/0!	12	X12	#DIV/0!	0	#DIV/0!	12	X12	#DIV/0!	0	#DIV/0!	12	X12	#DIV/0!	0	#DIV/0!
D	XD	0	0	#DIV/0!	D	XD	#DIV/0!	#DIV/0!	#DIV/0!	D	XD	#DIV/0!	#DIV/0!	#DIV/0!	D	XD	#DIV/0!	#DIV/0!	#DIV/0!	D	XD	#DIV/0!	#DIV/0!	#DIV/0!	D	XD	#DIV/0!	#DIV/0!	#DIV/0!	D	XD	#DIV/0!	#DIV/0!	#DIV/0!	D	XD	#DIV/0!	#DIV/0!	#DIV/0!	D	XD	#DIV/0!	#DIV/0!	#DIV/0!	D	XD	#DIV/0!	#DIV/0!	#DIV/0!
		Σ (Xi+1 / 2^i)	0				Σ (Xi+1 / 2^i)	#DIV/0!				Σ (Xi+1 / 2^i)	#DIV/0!				Σ (Xi+1 / 2^i)	#DIV/0!				Σ (Xi+1 / 2^i)	#DIV/0!				Σ (Xi+1 / 2^i)	#DIV/0!				Σ (Xi+1 / 2^i)	#DIV/0!				Σ (Xi+1 / 2^i)	#DIV/0!				Σ (Xi+1 / 2^i)	#DIV/0!				Σ (Xi+1 / 2^i)	#DIV/0!
		Φ	#DIV/0!				Φ	#DIV/0!				Φ	#DIV/0!				Φ	#DIV/0!				Φ	#DIV/0!				Φ	#DIV/0!				Φ	#DIV/0!				Φ	#DIV/0!				Φ	#DIV/0!				Φ	#DIV/0!
For D Divisions	Φ1	Copy Data			For D Divisions	Φ2				For D Divisions	Φ3				For D Divisions	Φ4				For D Divisions	Φ5				For D Divisions	Φ6				For D Divisions	Φ7				For D Divisions	Φ8				For D Divisions	Φ9				For D Divisions	Φ10
i = 1 to D	D=	Viability =			i = 1 to D	D=	Viability =			i = 1 to D	D=	Viability =			i = 1 to D	D=	Viability =			i = 1 to D	D=	Viability =			i = 1 to D	D=	Viability =			i = 1 to D	D=	Viability =			i = 1 to D	D=	Viability =			i = 1 to D	D=	Viability =			i = 1 to D	D=	Viability =
i	Xi	Xi Value	Xi+1 / 2^i	Xi''	i	Xi	Xi Value	Xi+1 / 2^i	Xi''	i	Xi	Xi Value	Xi+1 / 2^i	Xi''	i	Xi	Xi Value	Xi+1 / 2^i	Xi''	i	Xi	Xi Value	Xi+1 / 2^i	Xi''	i	Xi	Xi Value	Xi+1 / 2^i	Xi''	i	Xi	Xi Value	Xi+1 / 2^i	Xi''	i	Xi	Xi Value	Xi+1 / 2^i	Xi''	i	Xi	Xi Value	Xi+1 / 2^i	Xi''	i	Xi	Xi Value	Xi+1 / 2^i	Xi''
1	X1		0	#DIV/0!	1	X1	#DIV/0!	#DIV/0!	#DIV/0!	1	X1	#DIV/0!	#DIV/0!	#DIV/0!	1	X1	#DIV/0!	#DIV/0!	#DIV/0!	1	X1	#DIV/0!	#DIV/0!	#DIV/0!	1	X1	#DIV/0!	#DIV/0!	#DIV/0!	1	X1	#DIV/0!	#DIV/0!	#DIV/0!	1	X1	#DIV/0!	#DIV/0!	#DIV/0!	1	X1	#DIV/0!	#DIV/0!	#DIV/0!	1	X1	#DIV/0!	#DIV/0!	#DIV/0!
2	X2		0	#DIV/0!	2	X2	#DIV/0!	#DIV/0!	#DIV/0!	2	X2	#DIV/0!	#DIV/0!	#DIV/0!	2	X2	#DIV/0!	#DIV/0!	#DIV/0!	2	X2	#DIV/0!	#DIV/0!	#DIV/0!	2	X2	#DIV/0!	#DIV/0!	#DIV/0!	2	X2	#DIV/0!	#DIV/0!	#DIV/0!	2	X2	#DIV/0!	#DIV/0!	#DIV/0!	2	X2	#DIV/0!	#DIV/0!	#DIV/0!	2	X2	#DIV/0!	#DIV/0!	#DIV/0!
3	X3		0	#DIV/0!	3	X3	#DIV/0!	#DIV/0!	#DIV/0!	3	X3	#DIV/0!	#DIV/0!	#DIV/0!	3	X3	#DIV/0!	#DIV/0!	#DIV/0!	3	X3	#DIV/0!	#DIV/0!	#DIV/0!	3	X3	#DIV/0!	#DIV/0!	#DIV/0!	3	X3	#DIV/0!	#DIV/0!	#DIV/0!	3	X3	#DIV/0!	#DIV/0!	#DIV/0!	3	X3	#DIV/0!	#DIV/0!	#DIV/0!	3	X3	#DIV/0!	#DIV/0!	#DIV/0!
4	X4		0	#DIV/0!	4	X4	#DIV/0!	#DIV/0!	#DIV/0!	4	X4	#DIV/0!	#DIV/0!	#DIV/0!	4	X4	#DIV/0!	#DIV/0!	#DIV/0!	4	X4	#DIV/0!	#DIV/0!	#DIV/0!	4	X4	#DIV/0!	#DIV/0!	#DIV/0!	4	X4	#DIV/0!	#DIV/0!	#DIV/0!	4	X4	#DIV/0!	#DIV/0!	#DIV/0!	4	X4	#DIV/0!	#DIV/0!	#DIV/0!	4	X4	#DIV/0!	#DIV/0!	#DIV/0!
5	X5		0	#DIV/0!	5	X5	#DIV/0!	#DIV/0!	#DIV/0!	5	X5	#DIV/0!	#DIV/0!	#DIV/0!	5	X5	#DIV/0!	#DIV/0!	#DIV/0!	5	X5	#DIV/0!	#DIV/0!	#DIV/0!	5	X5	#DIV/0!	#DIV/0!	#DIV/0!	5	X5	#DIV/0!	#DIV/0!	#DIV/0!	5	X5	#DIV/0!	#DIV/0!	#DIV/0!	5	X5	#DIV/0!	#DIV/0!	#DIV/0!	5	X5	#DIV/0!	#DIV/0!	#DIV/0!
6	X6		0	#DIV/0!	6	X6	#DIV/0!	#DIV/0!	#DIV/0!	6	X6	#DIV/0!	#DIV/0!	#DIV/0!	6	X6	#DIV/0!	#DIV/0!	#DIV/0!	6	X6	#DIV/0!	#DIV/0!	#DIV/0!	6	X6	#DIV/0!	#DIV/0!	#DIV/0!	6	X6	#DIV/0!	#DIV/0!	#DIV/0!	6	X6	#DIV/0!	#DIV/0!	#DIV/0!	6	X6	#DIV/0!	#DIV/0!	#DIV/0!	6	X6	#DIV/0!	#DIV/0!	#DIV/0!
7	X7		0	#DIV/0!	7	X7	#DIV/0!	#DIV/0!	#DIV/0!	7	X7	#DIV/0!	#DIV/0!	#DIV/0!	7	X7	#DIV/0!	#DIV/0!	#DIV/0!	7	X7	#DIV/0!	#DIV/0!	#DIV/0!	7	X7	#DIV/0!	#DIV/0!	#DIV/0!	7	X7	#DIV/0!	#DIV/0!	#DIV/0!	7	X7	#DIV/0!	#DIV/0!	#DIV/0!	7	X7	#DIV/0!	#DIV/0!	#DIV/0!	7	X7	#DIV/0!	#DIV/0!	#DIV/0!
8	X8		0	#DIV/0!	8	X8	#DIV/0!	#DIV/0!	#DIV/0!	8	X8	#DIV/0!	#DIV/0!	#DIV/0!	8	X8	#DIV/0!	#DIV/0!	#DIV/0!	8	X8	#DIV/0!	#DIV/0!	#DIV/0!	8	X8	#DIV/0!	#DIV/0!	#DIV/0!	8	X8	#DIV/0!	#DIV/0!	#DIV/0!	8	X8	#DIV/0!	#DIV/0!	#DIV/0!	8	X8	#DIV/0!	#DIV/0!	#DIV/0!	8	X8	#DIV/0!	#DIV/0!	#DIV/0!
9	X9		0	#DIV/0!	9	X9	#DIV/0!	#DIV/0!	#DIV/0!	9	X9	#DIV/0!	#DIV/0!	#DIV/0!	9	X9	#DIV/0!	#DIV/0!	#DIV/0!	9	X9	#DIV/0!	#DIV/0!	#DIV/0!	9	X9	#DIV/0!	#DIV/0!	#DIV/0!	9	X9	#DIV/0!	#DIV/0!	#DIV/0!	9	X9	#DIV/0!	#DIV/0!	#DIV/0!	9	X9	#DIV/0!	#DIV/0!	#DIV/0!	9	X9	#DIV/0!	#DIV/0!	#DIV/0!
10	X10		0	#DIV/0!	10	X10	#DIV/0!	#DIV/0!	#DIV/0!	10	X10	#DIV/0!	#DIV/0!	#DIV/0!	10	X10	#DIV/0!	#DIV/0!	#DIV/0!	10	X10	#DIV/0!	#DIV/0!	#DIV/0!	10	X10	#DIV/0!	#DIV/0!	#DIV/0!	10	X10	#DIV/0!	#DIV/0!	#DIV/0!	10	X10	#DIV/0!	#DIV/0!	#DIV/0!	10	X10	#DIV/0!	#DIV/0!	#DIV/0!	10	X10	#DIV/0!	#DIV/0!	#DIV/0!
11	X11		0	#DIV/0!	11	X11	#DIV/0!	#DIV/0!	#DIV/0!	11	X11	#DIV/0!	#DIV/0!	#DIV/0!	11	X11	#DIV/0!	#DIV/0!	#DIV/0!	11	X11	#DIV/0!	#DIV/0!	#DIV/0!	11	X11	#DIV/0!	#DIV/0!	#DIV/0!	11	X11	#DIV/0!	#DIV/0!	#DIV/0!	11	X11	#DIV/0!	#DIV/0!	#DIV/0!	11	X11	#DIV/0!	#DIV/0!	#DIV/0!	11	X11	#DIV/0!	#DIV/0!	#DIV/0!
12	X12		0	#DIV/0!	12	X12	#DIV/0!	0	#DIV/0!	12	X12	#DIV/0!	0	#DIV/0!	12	X12	#DIV/0!	0	#DIV/0!	12	X12	#DIV/0!	0	#DIV/0!	12	X12	#DIV/0!	0	#DIV/0!	12	X12	#DIV/0!	0	#DIV/0!	12	X12	#DIV/0!	0	#DIV/0!	12	X12	#DIV/0!	0	#DIV/0!	12	X12	#DIV/0!	0	#DIV/0!
D	XD	0	0	#DIV/0!	D	XD	#DIV/0!	#DIV/0!	#DIV/0!	D	XD	#DIV/0!	#DIV/0!	#DIV/0!	D	XD	#DIV/0!	#DIV/0!	#DIV/0!	D	XD	#DIV/0!	#DIV/0!	#DIV/0!	D	XD	#DIV/0!	#DIV/0!	#DIV/0!	D	XD	#DIV/0!	#DIV/0!	#DIV/0!	D	XD	#DIV/0!	#DIV/0!	#DIV/0!	D	XD	#DIV/0!	#DIV/0!	#DIV/0!	D	XD	#DIV/0!	#DIV/0!	#DIV/0!
		Σ (Xi+1 / 2^i)	0				Σ (Xi+1 / 2^i)	#DIV/0!				Σ (Xi+1 / 2^i)	#DIV/0!				Σ (Xi+1 / 2^i)	#DIV/0!				Σ (Xi+1 / 2^i)	#DIV/0!				Σ (Xi+1 / 2^i)	#DIV/0!				Σ (Xi+1 / 2^i)	#DIV/0!				Σ (Xi+1 / 2^i)	#DIV/0!				Σ (Xi+1 / 2^i)	#DIV/0!				Σ (Xi+1 / 2^i)	#DIV/0!
		Φ	#DIV/0!				Φ	#DIV/0!				Φ	#DIV/0!				Φ	#DIV/0!				Φ	#DIV/0!				Φ	#DIV/0!				Φ	#DIV/0!				Φ	#DIV/0!				Φ	#DIV/0!				Φ	#DIV/0!
For D Divisions	Φ1	Copy Data			For D Divisions	Φ2				For D Divisions	Φ3				For D Divisions	Φ4				For D Divisions	Φ5				For D Divisions	Φ6				For D Divisions	Φ7				For D Divisions	Φ8				For D Divisions	Φ9				For D Divisions	Φ10
i = 1 to D	D=	Viability =			i = 1 to D	D=	Viability =			i = 1 to D	D=	Viability =			i = 1 to D	D=	Viability =			i = 1 to D	D=	Viability =			i = 1 to D	D=	Viability =			i = 1 to D	D=	Viability =			i = 1 to D	D=	Viability =			i = 1 to D	D=	Viability =			i = 1 to D	D=	Viability =
i	Xi	Xi Value	Xi+1 / 2^i	Xi''	i	Xi	Xi Value	Xi+1 / 2^i	Xi''	i	Xi	Xi Value	Xi+1 / 2^i	Xi''	i	Xi	Xi Value	Xi+1 / 2^i	Xi''	i	Xi	Xi Value	Xi+1 / 2^i	Xi''	i	Xi	Xi Value	Xi+1 / 2^i	Xi''	i	Xi	Xi Value	Xi+1 / 2^i	Xi''	i	Xi	Xi Value	Xi+1 / 2^i	Xi''	i	Xi	Xi Value	Xi+1 / 2^i	Xi''	i	Xi	Xi Value	Xi+1 / 2^i	Xi''
1	X1		0	#DIV/0!	1	X1	#DIV/0!	#DIV/0!	#DIV/0!	1	X1	#DIV/0!	#DIV/0!	#DIV/0!	1	X1	#DIV/0!	#DIV/0!	#DIV/0!	1	X1	#DIV/0!	#DIV/0!	#DIV/0!	1	X1	#DIV/0!	#DIV/0!	#DIV/0!	1	X1	#DIV/0!	#DIV/0!	#DIV/0!	1	X1	#DIV/0!	#DIV/0!	#DIV/0!	1	X1	#DIV/0!	#DIV/0!	#DIV/0!	1	X1	#DIV/0!	#DIV/0!	#DIV/0!
2	X2		0	#DIV/0!	2	X2	#DIV/0!	#DIV/0!	#DIV/0!	2	X2	#DIV/0!	#DIV/0!	#DIV/0!	2	X2	#DIV/0!	#DIV/0!	#DIV/0!	2	X2	#DIV/0!	#DIV/0!	#DIV/0!	2	X2	#DIV/0!	#DIV/0!	#DIV/0!	2	X2	#DIV/0!	#DIV/0!	#DIV/0!	2	X2	#DIV/0!	#DIV/0!	#DIV/0!	2	X2	#DIV/0!	#DIV/0!	#DIV/0!	2	X2	#DIV/0!	#DIV/0!	#DIV/0!
3	X3		0	#DIV/0!	3	X3	#DIV/0!	#DIV/0!	#DIV/0!	3	X3	#DIV/0!	#DIV/0!	#DIV/0!	3	X3	#DIV/0!	#DIV/0!	#DIV/0!	3	X3	#DIV/0!	#DIV/0!	#DIV/0!	3	X3	#DIV/0!	#DIV/0!	#DIV/0!	3	X3	#DIV/0!	#DIV/0!	#DIV/0!	3	X3	#DIV/0!	#DIV/0!	#DIV/0!	3	X3	#DIV/0!	#DIV/0!	#DIV/0!	3	X3	#DIV/0!	#DIV/0!	#DIV/0!
4	X4		0	#DIV/0!	4	X4	#DIV/0!	#DIV/0!	#DIV/0!	4	X4	#DIV/0!	#DIV/0!	#DIV/0!	4	X4	#DIV/0!	#DIV/0!	#DIV/0!	4	X4	#DIV/0!	#DIV/0!	#DIV/0!	4	X4	#DIV/0!	#DIV/0!	#DIV/0!	4	X4	#DIV/0!	#DIV/0!	#DIV/0!	4	X4	#DIV/0!	#DIV/0!	#DIV/0!	4	X4	#DIV/0!	#DIV/0!	#DIV/0!	4	X4	#DIV/0!	#DIV/0!	#DIV/0!
5	X5		0	#DIV/0!	5	X5	#DIV/0!	#DIV/0!	#DIV/0!	5	X5	#DIV/0!	#DIV/0!	#DIV/0!	5	X5	#DIV/0!	#DIV/0!	#DIV/0!	5	X5	#DIV/0!	#DIV/0!	#DIV/0!	5	X5	#DIV/0!	#DIV/0!	#DIV/0!	5	X5	#DIV/0!	#DIV/0!	#DIV/0!	5	X5	#DIV/0!	#DIV/0!	#DIV/0!	5	X5	#DIV/0!	#DIV/0!	#DIV/0!	5	X5	#DIV/0!	#DIV/0!	#DIV/0!
6	X6		0	#DIV/0!	6	X6	#DIV/0!	#DIV/0!	#DIV/0!	6	X6	#DIV/0!	#DIV/0!	#DIV/0!	6	X6	#DIV/0!	#DIV/0!	#DIV/0!	6	X6	#DIV/0!	#DIV/0!	#DIV/0!	6	X6	#DIV/0!	#DIV/0!	#DIV/0!	6	X6	#DIV/0!	#DIV/0!	#DIV/0!	6	X6	#DIV/0!	#DIV/0!	#DIV/0!	6	X6	#DIV/0!	#DIV/0!	#DIV/0!	6	X6	#DIV/0!	#DIV/0!	#DIV/0!
7	X7		0	#DIV/0!	7	X7	#DIV/0!	#DIV/0!	#DIV/0!	7	X7	#DIV/0!	#DIV/0!	#DIV/0!	7	X7	#DIV/0!	#DIV/0!	#DIV/0!	7	X7	#DIV/0!	#DIV/0!	#DIV/0!	7	X7	#DIV/0!	#DIV/0!	#DIV/0!	7	X7	#DIV/0!	#DIV/0!	#DIV/0!	7	X7	#DIV/0!	#DIV/0!	#DIV/0!	7	X7	#DIV/0!	#DIV/0!	#DIV/0!	7	X7	#DIV/0!	#DIV/0!	#DIV/0!
8	X8		0	#DIV/0!	8	X8	#DIV/0!	#DIV/0!	#DIV/0!	8	X8	#DIV/0!	#DIV/0!	#DIV/0!	8	X8	#DIV/0!	#DIV/0!	#DIV/0!	8	X8	#DIV/0!	#DIV/0!	#DIV/0!	8	X8	#DIV/0!	#DIV/0!	#DIV/0!	8	X8	#DIV/0!	#DIV/0!	#DIV/0!	8	X8	#DIV/0!	#DIV/0!	#DIV/0!	8	X8	#DIV/0!	#DIV/0!	#DIV/0!	8	X8	#DIV/0!	#DIV/0!	#DIV/0!
9	X9		0	#DIV/0!	9	X9	#DIV/0!	#DIV/0!	#DIV/0!	9	X9	#DIV/0!	#DIV/0!	#DIV/0!	9	X9	#DIV/0!	#DIV/0!	#DIV/0!	9	X9	#DIV/0!	#DIV/0!	#DIV/0!	9	X9	#DIV/0!	#DIV/0!	#DIV/0!	9	X9	#DIV/0!	#DIV/0!	#DIV/0!	9	X9	#DIV/0!	#DIV/0!	#DIV/0!	9	X9	#DIV/0!	#DIV/0!	#DIV/0!	9	X9	#DIV/0!	#DIV/0!	#DIV/0!
10	X10		0	#DIV/0!	10	X10	#DIV/0!	#DIV/0!	#DIV/0!	10	X10	#DIV/0!	#DIV/0!	#DIV/0!	10	X10	#DIV/0!	#DIV/0!	#DIV/0!	10	X10	#DIV/0!	#DIV/0!	#DIV/0!	10	X10	#DIV/0!	#DIV/0!	#DIV/0!	10	X10	#DIV/0!	#DIV/0!	#DIV/0!	10	X10	#DIV/0!	#DIV/0!	#DIV/0!	10	X10	#DIV/0!	#DIV/0!	#DIV/0!	10	X10	#DIV/0!	#DIV/0!	#DIV/0!
11	X11		0	#DIV/0!	11	X11	#DIV/0!	#DIV/0!	#DIV/0!	11	X11	#DIV/0!	#DIV/0!	#DIV/0!	11	X11	#DIV/0!	#DIV/0!	#DIV/0!	11	X11	#DIV/0!	#DIV/0!	#DIV/0!	11	X11	#DIV/0!	#DIV/0!	#DIV/0!	11	X11	#DIV/0!	#DIV/0!	#DIV/0!	11	X11	#DIV/0!	#DIV/0!	#DIV/0!	11	X11	#DIV/0!	#DIV/0!	#DIV/0!	11	X11	#DIV/0!	#DIV/0!	#DIV/0!
12	X12		0	#DIV/0!	12	X12	#DIV/0!	0	#DIV/0!	12	X12	#DIV/0!	0	#DIV/0!	12	X12	#DIV/0!	0	#DIV/0!	12	X12	#DIV/0!	0	#DIV/0!	12	X12	#DIV/0!	0	#DIV/0!	12	X12	#DIV/0!	0	#DIV/0!	12	X12	#DIV/0!	0	#DIV/0!	12	X12	#DIV/0!	0	#DIV/0!	12	X12	#DIV/0!	0	#DIV/0!
D	XD	0	0	#DIV/0!	D	XD	#DIV/0!	#DIV/0!	#DIV/0!	D	XD	#DIV/0!	#DIV/0!	#DIV/0!	D	XD	#DIV/0!	#DIV/0!	#DIV/0!	D	XD	#DIV/0!	#DIV/0!	#DIV/0!	D	XD	#DIV/0!	#DIV/0!	#DIV/0!	D	XD	#DIV/0!	#DIV/0!	#DIV/0!	D	XD	#DIV/0!	#DIV/0!	#DIV/0!	D	XD	#DIV/0!	#DIV/0!	#DIV/0!	D	XD	#DIV/0!	#DIV/0!	#DIV/0!
		Σ (Xi+1 / 2^i)	0				Σ (Xi+1 / 2^i)	#DIV/0!				Σ (Xi+1 / 2^i)	#DIV/0!				Σ (Xi+1 / 2^i)	#DIV/0!				Σ (Xi+1 / 2^i)	#DIV/0!				Σ (Xi+1 / 2^i)	#DIV/0!				Σ (Xi+1 / 2^i)	#DIV/0!				Σ (Xi+1 / 2^i)	#DIV/0!				Σ (Xi+1 / 2^i)	#DIV/0!				Σ (Xi+1 / 2^i)	#DIV/0!
		Φ	#DIV/0!				Φ	#DIV/0!				Φ	#DIV/0!				Φ	#DIV/0!				Φ	#DIV/0!				Φ	#DIV/0!				Φ	#DIV/0!				Φ	#DIV/0!				Φ	#DIV/0!				Φ	#DIV/0!
[truncated: 8 more columns]

## Sheet: C_ Plot Theta(i)vsi_Copy From B
i	Φi	θi		i	Φi	θi		i	Φi	θi		i	Φi	θi		i	Φi	θi		i	Φi	θi		i	Φi	θi		i	Φi	θi		i	Φi	θi		i	Φi	θi		i	Φi	θi		i	Φi	θi	Group One	i	Φi
Treatment A																																																	Mean
1	69.869	30.131																																														1	69.869
2	38.6473	61.3527																																														2	38.6473
3	12.5984	87.4016																																														3	12.5984
4	54.0541	45.9459																																														4	54.0541
5	39.2157	60.7843																																														5	39.2157
6	70.9677	29.0323																																														6	70.9677
7	55.5556	44.4444																																														7	55.5556
8	68.75	31.25																																														8	68.75
9	100	0																																														9	100
10	#DIV/0!	#DIV/0!																																														10	#DIV/0!
11	#DIV/0!	#DIV/0!																																														11	#DIV/0!
i	Φi	θi		i	Φi	θi		i	Φi	θi		i	Φi	θi		i	Φi	θi		i	Φi	θi		i	Φi	θi		i	Φi	θi		i	Φi	θi		i	Φi	θi		i	Φi	θi		i	Φi	θi	Group Two	i	Φi
Treatment B																																																	Mean
1	49.4399	50.5601																																														1	49.4399
2	39.1138	60.8862																																														2	39.1138
3	32.1205	67.8795																																														3	32.1205
4	61.0043	38.9957																																														4	61.0043
5	36.1991	63.8009																																														5	36.1991
6	85.1064	14.8936																																														6	85.1064
7	66.6667	33.3333																																														7	66.6667
8	100	0																																														8	100
9	#DIV/0!	#DIV/0!																																														9	#DIV/0!
10	#DIV/0!	#DIV/0!																																														10	#DIV/0!
11	#DIV/0!	#DIV/0!																																														11	#DIV/0!
[truncated: 5 more columns]
